# Supplementary material for: Unlocking the potential: machine learning applications in electrocatalyst design for electrochemical hydrogen energy transformation
Source: Royal Society of Chemistry journal article supplement (doi:10.1039/d4cs00844h), 2024-01-01
Supplement: d4cs00844h1.xlsx [file d4cs00844h1.xlsx]

## Sheet: HER
Publication	Subsection	Investigated Material System	Electrolyte	Input Features	Output Target	Most Decisive Material Feature Identified	ML Paradigm	Dataset	Dataset Type	ML Algorithms	Best ML Algorithm	Title	Reference Number in Manuscript	Have Included Classical ML Algorithm	Have Included Neural Networks	Only Use Classical ML Algorithm	Only Use Neural Networks
J. Am. Chem. Soc., 2021, 143, 5355–5363	Platinum-Based	Jagged Pt nanowires	Alkaline	Atom-centered Symmetry Functions (ACSF), Crystal Graph Convolutional Neural Network (CGCNN), Schnet and nearest atom distance-gaussian process methods generated descriptor matrix, based on the local environments of 3413 binding sites of the slabs, which are converted to a labeled site representation, as well as coordination numbers and site types (top, bridge, hollow) for activity correlation	DFT-calculated Gibbs free energy of H binding	Coordination number of the Pt atoms on the jagged Pt nanowires	Supervised Learning | Regression | Unsupervised Learning for activity and local binding site environment correlation.	3413 adsorption energies of various sites on jagged Pt slabs made using ReaxFF	Density Functional Theory (DFT)	CGCNN, nearest atom distance-Gaussian process (NAD-GP), SchNet	Multilayer Perceptrons (MLP, basic artificial neural network, ANN) using ACSF as descriptor generating framework	Autobifunctional Mechanism of Jagged Pt Nanowires for Hydrogen Evolution Kinetics via End-to-End Simulation	67	Yes	Yes	No	No
ACS Catal., 2021, 11, 6298-6303	Platinum-Based	Platinum	Acidic	Microkinetic rate equations, Tafel plots, and standard heterogeneous rate constants	Experimental-estimated Gibbs free energy of H binding	The positive hydrogen binding energy of platinum.	Supervised Learning | Regression | Genetic Algorithm and Gradient Descent	Experimental Tafel plots and cyclic voltammetry data	Experimental	Genetic algorithm combined with gradient descent	Genetic algorithm combined with gradient descent	Non-Zero Binding Enhances Kinetics of Catalysis: Machine Learning Analysis on the Experimental Hydrogen Binding Energy of Platinum	69	Yes	No	Yes	No
J. Mater. Chem. A, 2020, 8, 17987-17997	Platinum-Based	(100) surfaces of bimetallic alloys (Pd/Pt-Ag/Au/Cu)	Acidic	26 physical variables like electronegativity, d-orbital information, and d-band center, among others. Feature selection was performed using the Extremely Randomized Trees (ERT) method	DFT-calculated H binding energy	d-band center	Supervised learning | Regression	More than 450 binding energies of H were calculated based on DFT, with each alloy composition having more than fifteen randomly alloyed geometries generated	DFT	Back-Propagation Neural Network (BPNN), namely MLP	MLP	Computational design of (100) alloy surfaces for the hydrogen evolution reaction	70	No	Yes	No	Yes
ACS Comb. Sci., 2020, 12, 768–781	Platinum-Based	55 atom bimetallic icosahedral Pt nanoclusters composed of binary combinations of the elements Ti, Fe, Co, Ni, and Cu	Not Mentioned	Electronic descriptors such as d-band related ϵd, ϵdw, and ϵu, as well as structural descriptors like Smooth Overlap of Atomic Positions (SOAP) and LDOS (local density of states)	DFT-calculated H binding energy	d-band Hilbert-transform (ϵu)	Supervised Learning | Regression | ML-Assisted DFT Computation Loop	1767 DFT-calculated data points for adsorption energies on the 86 most stable nanoclusters	DFT	Kernel Ridge (KR)	KR	Efficient Machine-Learning-Aided Screening of Hydrogen Adsorption on Bimetallic Nanoclusters	71	Yes	No	Yes	No
J. Phys. Chem. Lett., 2021, 12, 7305-7311	Platinum-Based	30 binary alloys and seven ternary alloys	Not Mentioned	Atomic connectivity lists, nodes of the crystal graph (CG) corresponding to atoms, and CG edges corresponding to chemical bonds between atoms	DFT-calculated H binding energy	Not mentioned	Supervised Learning | Regression | Active Learning	3984 distinct structures for H adsorption and 2313 distinct structures for CO adsorption from Tran and Ulissi's data set, along with 1253, 1351, and 1278 DFT samples for H, CO, and O adsorption generated during the AL process	DFT	Current advanced Graph Neural Network (GNN) framework: DimeNet++	DimeNet++	Low-Cost Pt Alloys for Heterogeneous Catalysis Predicted by Density Functional Theory and Active Learning	72	No	Yes	No	Yes
Chin. Chem. Lett., 2023, 34, 107833.	Platinum-Based	Pt-modified amorphous alloy (Pt@PdNiCuP)	Not Mentioned	Distance contribution descriptors representing the coordination and ligand states of H atom adsorption sites, derived from the distances between H atoms and surrounding metal atoms (Pt, Pd, Ni, Cu, P) in the local atomic environment.	DFT-calculated Gibbs free energy of H binding	Coordination and ligand states of H atom adsorption sites with Pt, Pd, and Ni	Supervised Learning | Regression	46,000 adsorption sites on the Pt@PdNiCuP surface, with an additional detailed dataset of 920 H adsorption sites for accurate DFT-level Gibbs free energy calculations	DFT	Support Vector (SV) Regressor	SVM	Machine learning accelerated DFT research on platinum-modified amorphous alloy surface catalysts	75	Yes	No	Yes	No
Adv. Mater., 2022, 34, 2108900	Platinum-Based	Pt–Ru–Ni ternary system	Acidic	Mole fraction of metal precursors used for nanoparticle synthesis by the carbothermal shock method, which forms an 8D composition vector space	Experimental HER electrocatalytic overpotential at 10 mA cm-2	Not mentioned	Supervised Learning | Regression | Active Learning (Bayesian optimization; BO)	Initially started with 73 preliminary experimental data points; 20 points of high uncertainty in each binary iteration loop and 20 points in each ternary iteration loop, two loops	Experimental	Gaussian Process (GP) Regressor	GP	Searching for an Optimal Multi-Metallic Alloy Catalyst by Active Learning Combined with Experiments	77	Yes	No	Yes	No
Catal. Sci. Technol., 2021,11, 6832-6838	Platinum-Based	Pt, Ir, Pd, and Rh	Acidic	Combination of primary atomic features such as empirical radius, mass, number, period in the Periodic Table, electron affinity, ionization energy, and Pauling electronegativity, along with metal features like density and work function	Experimental the exchange current density	Absolute value of Gibbs free energy of H binding	Supervised Learning | Regression	Experimental data compiled from prior literature reports	Experimental	Sure independence screening and sparsifying operator (SISSO)	SISSO	Revisiting trends in the exchange current for hydrogen evolution	78	Yes	No	Yes	No
Nanoscale, 2022, 14, 2660-2667	Non-Pt Based	Amorphous alloy Pd40Ni10Cu30P20	Not Mentioned	Electronic and spatial information features extracted from the SOAP descriptor	DFT-calculated Gibbs free energy of H binding	Not mentioned	Supervised Learning | Regression	540 active sites on both surfaces of the amorphous alloy Pd40Ni10Cu30P20	DFT	GP	GP	Exploring the physical origin of the electrocatalytic performance of an amorphous alloy catalyst via machine learning accelerated DFT study	80	Yes	No	Yes	No
J. Chem. Inf. Model., 2019, 59, 1357-1365.	Non-Pt Based	Ag alloys (211) facet	Not Mentioned	Combination of structural and chemical features. The structural features consist of binary matrices encoding the structural arrangement of dopant atoms on the Ag(211) lattice, resulting in 713 binary features. The chemical features include properties of the dopant elements such as tight-binding d-orbital radius and energy, d block column, row, Pauling electronegativity, covalent radius, mass dens…	DFT-calculated H binding energy	Not mentioned. However, features such as the number of first nearest-neighbor dopants and second moment of eigenvalues weighted by the nearest neighbor step atom were crucial.	Supervised Learning | Regression	≈1000 configurations	DFT	Least absolute shrinkage and selection operator (LASSO) (linear and quadratic), kernel ridge (neural network and ridge), Random Forest (RF), and extra forest (ET)	ET	Machine Learning Prediction of H Adsorption Energies on Ag Alloys	81	Yes	Yes	No	No
J. Phys. Chem. C 2023, 127, 29, 14211–14221	Non-Pt Based	25 atom cluster system [MxAu25–x(SCH3)18]q, where M is in the set { Pd, Cu }, x is in {0, 1}, and q is in [−2, 2]	Not Mentioned	Charge and geometric, graph theoretical, and tabulated properties features from Weisfeiler–Lehman (WL) updates. For different splitting schemes, the number of kernels varies: 0:20, 1:40, 2:140, 3:140, and 4:360	DFT-calculated Hydrogen-catalyst interaction energies, minmax-scaled in [−1, 1]	Geometric properties	Supervised Learning | Regression	3994 configurations, of which 655 structures contained only gold atoms in the nanoparticle, 2446 systems had one Au changed to Cu, and 893 systems included the change of one Au to Pd atom	DFT	Minimal learning machine (MLM), extreme minimal learning machine (EMLM), KR, and learning kernel ridge (LKR) regression	MLM and EMLM	Graphs and Kernelized Learning Applied to Interactions of Hydrogen with Doped Gold Nanoparticle Electrocatalysts	82	Yes	No	Yes	No
J. Phys. Chem. Lett. 2022, 13, 7583–7593	Non-Pt Based	Earth-abundant heterogeneous NiCoCu-based alloys	Not Mentioned	12 surface microstructural features representing the atomic positions in the catalytic surfaces (number of Ni, Co, Cu ions)	DFT-calculated H and H2 molecue binding energy	Not mentioned. But highlighted the significant role of Cu in region 1.	Supervised Learning | Regression	63 structure combinations	DFT	Linear Regression (LR),KR, SVM, GP, and XGBoost	XGBoost	Rational Designing of Bimetallic/Trimetallic Hydrogen Evolution Reaction Catalysts Using Supervised Machine Learning	83	Yes	No	Yes	No
Npj Comput. Mater., 2021, 7, 46	Non-Pt Based	Cu-based alloy nanoclusters, specifically Cu55-nMn clusters with different compositions (M = Co, Ni, Ru, and Rh)	Not Mentioned	Coordination number and the mean Bader charge of the first-neighbor and the second-neighbor atoms of the active site on the outer atomic shell	DFT-calculated Gibbs free energy of H binding	Coordination number and the mean Bader charge of the surrounding atoms	Supervised Learning | Regression	420 adsorption free energies from DFT calculations	DFT	MLP	MLP	Computational high-throughput screening of alloy nanoclusters for electrocatalytic hydrogen evolution	84	No	Yes	No	Yes
Adv. Func. Mater., 32, 2208418	Non-Pt Based	(111) surfaces of 823 binary alloys	Not Mentioned	Input features used include the adsorption positions of H atoms on the alloy surfaces, automatically recognized by CGCNN from the crystal structure	DFT-calculated Gibbs free energy of H binding	Not mentioned	Supervised Learning | Regression	2460 trajectories of H atom adsorption on the ontop and bridge sites of alloy surfaces	DFT	Schnet (structural optimization) and CGCNN (adsorption)	CGCNN	A Universal Machine Learning Framework for Electrocatalyst Innovation: A Case Study of Discovering Alloys for Hydrogen Evolution Reaction, Advanced Functional Materials.	85	No	Yes	No	Yes
Nanoscale, 2023, 15, 11072-11082	Non-Pt Based	Alloy electrocatalysts	Not Mentioned	280 features, consisting of 3 structural site features and 277 elemental properties, and 86 features were specifically selected by the Pearson correlation coefficient method	DFT-calculated Gibbs free energy of H binding	Mc (mean of group number of elements in an alloy)	Supervised Learning | Regression	8856 pieces of alloy catalysis data	DFT	LightGBM, XGBoost, RF, SVM , Gradient Boosting Decision Tree (GBDT), K nearest neibor (KNN)	LightGBM	Accurate and efficient machine learning models for predicting hydrogen evolution reaction catalysts based on structural and electronic feature engineering in alloys	86	Yes	No	Yes	No
Nat. Catal. 2018, 1, 696–703	Non-Pt Based	Intermetallic facets and combinations	258 candidate surfaces across 102 intermetallics	Numerical representations (fingerprints) of adsorption sites, which include elements' atomic number, electronegativity, coordination number, and median adsorption energy, total 32 features	DFT-calculated H and CO molecue binding energy	Not mentioned	Supervised Learning | Regression | Active Learning	42785 DFT calculations of adsorption energies were completed by this study at a rate of approximately 200–300 calculations per day	DFT	Tree-based Pipeline Optimization Tool (TPOT) Package	TPOT	Active learning across intermetallics to guide discovery of electrocatalysts for CO2 reduction and H2 evolution	87	Yes	No	Yes	No
J. Mater. Chem. A, 2023, 11, 19128-19137	Non-Pt Based	Single-Atom Alloys	Not Mentioned	Group number, period number , coupling matrix element , and oxygen adsorption energy on a pure surface composed of the dopant metal	DFT-calculated C, H, CH, CH2, and CH3 binding energy	Not mentioned	Supervised Learning | Regression | Active Learning (Bayesian optimization)	1200 BO searches were run for one campaign. The dataset includes DFT-calculated data points	DFT	GP	GP	Bayesian optimization of single-atom alloys and other bimetallics: efficient screening for alkane transformations, CO2 reduction, and hydrogen evolution	88	Yes	No	Yes	No
Chem. Eng. J. 2022, 430, 133126	Metal-free carbon	γ-graphyne nanoribbons with various terminations and widths	Not Mentioned	Parameters of active sites (Q and ρ): distances between the active site and the two directly bonded atoms (d2, d3), atom numbers (Z2, Z3), and atomic charge of the two atoms (Q2 and Q3)	DFT-calculated ηORR and ηHER	Atomic charge Q2	Supervised Learning | Regression	Approximately 300 data points	DFT	LightGBM, GBDT, RF , and Ridge Regression	LightGBM	Activating γ-graphyne nanoribbons as bifunctional electrocatalysts toward oxygen reduction and hydrogen evolution reactions by edge termination and nitrogen doping	92	Yes	No	Yes	No
J. Phys. Chem. C 2021, 125, 15918–15933	Metal-free carbon	Nitrogen-doped and defective carbon nanotubes with types achiral zigzag (14, 0) and armchair (8, 8). They consist of up to 224 atoms in a periodically repeated simulation cell	Not Mentioned	25 different structural, chemical, and electronic features including the atomic number of the adsorption site, the generalized coordination number of the nearest nitrogen etc	DFT-calculated H binding energy	Spin polarization (local magnetic moment) on the adsorption site, the adsorption-induced change in the generalized coordination number of the nearest nitrogen dopant, and the highest occupied molecular orbital–lowest unoccupied molecular orbital (HOMO–LUMO) gap of the system.	Supervised Learning | Regression	6477 GGA and 254 hybrid data points	DFT	RF	RF	Hydrogen Adsorption on Defective Nitrogen-Doped Carbon Nanotubes Explained via Machine Learning Augmented DFT Calculations and Game-Theoretic Feature Attributions	93	Yes	No	Yes	No
React. Chem. Eng., 2020, 5, 2134-2147	Metal-free carbon	Nitrogen-doped carbon catalysts	Acidic	Final temperature, heating rate during pyrolysis, and hold time for the experimental synthesis space; nitrogen species, pore volume, surface area, and degree of crystallinity for the structural features space that leads to a 9D feature space when combined	Experimental measured onset potential and the maximum current density	Graphitic N content	Supervised Learning | Regression | Active Learning	Initial design of 10 points with 3 additional points per iteration	Experimental	Principal Component Analysis (PCA) for dimension reduction, Kriging methods with GP	GP	Active learning-driven quantitative synthesis–structure–property relations for improving performance and revealing active sites of nitrogen-doped carbon for the hydrogen evolution reaction	94	Yes	No	Yes	No
Adv. Func. Mater. 2021, 31, 2100547	TM-doped carbon	Co,N doped graphene with different proportions of Co-4N-P, Co-2N-A, and Co-2N-Z	Alkaline	MD calculated EXAFS spectrum	Proportion vector representing the amounts of Co-4N-P, Co-2N-A, and Co-2N-Z in the material	Not mentioned	Supervised Learning | Regression	Spectrum computed by FEFF of 1000 different configurations with 47 different proportions of structures	Molecular Dynamics (MD)	BPNN (MLP)	MLP	Identifying the activity origin of a cobalt single-atom catalyst for hydrogen evolution using supervised learning	98	No	Yes	No	Yes
J. Phys. Chem. C 2020, 124, 19571–19578	TM-doped carbon	TM single atom nitrogen-doped graphene	Not Mentioned	10 input descriptors include the d-states center, formation energy of the single atom site, number of filled and unfilled d states near the Fermi level, ionization potential, electronegativity, d electron count, and the covalent and Zunger d-orbital radii	DFT-calculated Gibbs free energy of H binding	The number of filled d states near the Fermi level	Supervised Learning | Regression	All possible elements in the four substrates, total 99 structures	DFT	KR, RF, MLP, and SISSO regression	MLP	Descriptors for Hydrogen Evolution on Single Atom Catalysts in Nitrogen-Doped Graphene	99	Yes	Yes	No	No
Sci. Rep., 2021, 11, 21911.	TM-doped carbon	TM (27 types) single atom nitrogen-doped graphene	Acidic and alkaline	10 features: covalent radius, Zunger radius of the atomic d-orbital, formation energy of the single-atom site, ionization energy, electronegativity, the d-band center, number of valence electrons, Bader charge, number of occupied d states, and number of unoccupied d states	DFT-calculated H binding energy	Covalent radius and the number of valence electrons	Supervised Learning | Regression | Gray Wolf Optimization	Single TM atoms embedded in N-doped nanographene of different sizes	DFT	Adaptive Neuro-Fuzzy Inference System (ANFIS) optimized by Gray Wolf Optimization	ANFIS	On the evaluation of hydrogen evolution reaction performance of metal-nitrogen-doped carbon electrocatalysts using machine learning technique	100	Yes	Yes	No	No
Nano Res., 2023, 17, 3352–3358	TM-doped carbon	TM single atom nitrogen-doped (C and N coordinated number sum=4) graphene	Not Mentioned	Properties of metal atoms and their coordination atoms like atomic group number, d-electron count, s-electron count, Pauling electronegativity, atomic radius, electron affinity, first ionization energy, and atomic mass	Gibbs free energy barrier of HER, considering dissociation energy of H2, and the adsorption energy of water molecule	Not mentioned	Supervised Learning | Regression	25 groups of data	DFT	Multi-scale Convolutional Neural Network (CNN)	CNN	Data-Driven Rational Design of Single-Atom Materials for Hydrogen Evolution and Sensing	101	No	Yes	No	Yes
ACS Appl. Mater. Interfaces 2023, 15, 12936–12945	TM-doped carbon	Dual-atom doped TM atoms on N-doped graphene	Not Mentioned	Chemical and spatial information of crystal described by CGCNN, or manually crafted features including: group numer, period number, electronegativity, covalent radii etc.	DFT-calculated Gibbs free energy of H binding	Not mentioned	Supervised Learning | Regression	435 homo- and hetero-dual atom-doped N6-graphenes	DFT	CGCNN, RF, GBDT, MEGNet	CGCNN	Data-Driven Discovery of Graphene-Based Dual-Atom Catalysts for Hydrogen Evolution Reaction with Graph Neural Network and DFT Calculations	102	Yes	Yes	No	No
Adv. Energy Mater. 2020, 10, 1903949	TM-doped carbon	TM-doped single atom graphdyine	Not Mentioned	8 features including electronegativity, electron affinity, ionization potential, d/f electrons, active sites, and mass numbers	DFT-calculated H, 2H, H2 binding energy	Not mentioned	Supervised Learning | Regression	DFT-calculated data points	DFT	Fuzzy C-Means, bagged tree	Bagged-tree	Accelerating atomic catalyst discovery by theoretical calculations-machine learning strategy	103	Yes	No	Yes	No
ACS Appl. Energy Mater. 2023, 6, 10, 5598–5606	Special Carbon Structures	Single atoms of metal (Al, Sc, Ti, V, Cr, Mn, Fe, Ni, Cu, Zn) and nonmetal (B, C, N, O, F, Si, P, S, Cl) embedded on various active sites of graphitic carbon nitride (g-C3N4).	Not Mentioned	28 primary features related to atomic and structural properties of SACs@g-C3N4. After feature engineering through statistical functions, the number of features increases to 60, including formation energy, bond length, boiling point, melting point, and valence electron etc.	DFT-calculated Gibbs free energy of H binding	Formation energy, bond length, valence electron, melting point, and boiling point	Supervised Learning | Regression	DFT-calculated properties of 80 configurations of single metal and nonmetal atoms embedded on g-C3N4	DFT	SVM, GBDT, RF, Adaboost, and MLP	SVM	Accelerating the Discovery of g-C3N4-Supported Single Atom Catalysts for Hydrogen Evolution Reaction: A Combined DFT and Machine Learning Strategy	105	Yes	Yes	No	No
J. Mater. Chem. A, 2022, 10, 6679-6689	Special Carbon Structures	Carbon-based TM SACs in diverse 2D materials including g-C3N4, π-conjugated polymer, pyridinic graphene, and hexagonal boron nitride	Not Mentioned	A set of 21 features are used as input for the ML model, which include 6 elemental features, 4 DFT-derived features, 2 SISSO generated features, and 9 Coulomb matrix elements	DFT-calculated Gibbs free energy of H binding (regression), thermodynamic stability energy and dissolution potential (classification)	Lowest-unoccupied Kohn–Sham eigenvalue, SISSO generated feature, Coulomb matrix element, angle between adsorbed hydrogen on TM and the sorted first nearest surface non-metal atom	Supervised Learning | Regression | Classification	Initially computed ∼364 mono- and dual type non-metal doped catalysts	DFT	12 ML algorithms including Sparse GP, CatBoost and ET etc.	CatBoost	Machine learning assisted high-throughput screening of transition metal single atom based superb hydrogen evolution electrocatalysts	106	Yes	No	Yes	No
J. Mater. Chem. A, 2022,10, 24362-24372	Special Carbon Structures	3d, 4d, and 5d TM atoms inserted into various carbon-based supports including N–C, C, Pc, C2N, C3N4, MOF, COF, and GDY	Acidic	254 features including elemental features of the TM active center, features of the coordination atom, and DFT-derived features, as well as the Coulomb matrix (redundant features removed)	DFT-calculated Gibbs free energy of H binding	The number of electrons in the unfilled d orbital, the d-band center of the metal in the system, group number, covalent radius, and specific Coulomb matrix elements	Supervised Learning | Regression	224 constructed SACs	DFT	7 different ML algorithms including KNN, SVM, GBDT, MLP etc.	GBDT	Theoretically revealing the activity origin of the hydrogen evolution reaction on carbon-based single-atom catalysts and finding ideal catalysts for water splitting	107	Yes	Yes	No	No
Adv. Theory Simul., 2019,2, 1800202	Special Carbon Structures	Endohedrally doped C60	Not Mentioned	6 electronic descriptors related to the electronic structure of the carbon atoms including the total band filling, Atomic radii, Charge transfer, p-band center etc.	DFT-calculated ηHER	Total band filling near the Fermi level	Supervised Learning | Regression	71 observations	DFT	RF and SVM	RF	Unraveling the Factors Behind the Efficiency of Hydrogen Evolution in Endohedrally Doped C60 Structures via Ab Initio Calculations and Insights from Machine Learning Models	108	Yes	No	Yes	No
Npj Comput. Mater., 2018, 4, 37	Chalcogenides	MoS2 and AuCu alloy nanoclusters	Not Mentioned	130 componets by PCA on Coulomb Matrix (CM), SOAP, Many-Body Tensor Representation (MBTR), and ACSF derived spatial and chemical descriptors	DFT-calculated H binding energy	Not mentioned, but SOAP as feature engineering strategy is the best	Supervised Learning | Regression	10,000 DFT-based ΔEH single-point calculations	DFT	KR	SOAP+KR	Machine learning hydrogen adsorption on nanoclusters through structural descriptors	115	Yes	No	Yes	No
J. Electrochem. Soc., 2021, 168, 126523	Chalcogenides	MoS2 synthesized through a hydrothermal technique	Acidic	Hydrothermal synthesis conditions such as temperature, reaction time, and Mo and S precursor concentrations	Experimental Measured η10 and the Tafel slope.	Not mentioned	Supervised Learning | Regression | Bayesian Optimization	Six batches in the loop	Experimental	GP	GP	Machine-Learning Assisted Exploration: Toward the Next-Generation Catalyst for Hydrogen Evolution Reaction	116	Yes	No	Yes	No
ACS Nano 2018, 12, 8006–8016	Chalcogenides	monolayer MoS2 with different defect densities	Not Mentioned	Sulfur vacancy distributions in a 2D MoS2 lattice	Optimized structures and their corresponding energies calculated using the ReaxFF force field	Not mentioned	Only genetic algorithm for optimization (could be regard as part of reinforcement learning)	Not mentioned	MD	Genetic Algorithm (GA; note: optimization algorithm)	GA	Defect Dynamics in 2-D MoS2 Probed by Using Machine Learning, Atomistic Simulations, and High-Resolution Microscopy	117	Yes	No	Yes	No
Sci. Rep., 2017, 7, 15243.	Chalcogenides	MoS2 with TM dopants like Fe, Co, Ni, and Cu	Not Mentioned	4 features including the type of system, the number of electrons in the outermost valence shell of the dopant, the ideal coordination number of the dopant , and the nearest-neighbor position of the adsorbing sulfur site relative to the dopant	DFT-calculated Gibbs free energy of H binding	Type of system (basal plane, Mo-0,…)	Supervised Learning | Regression	126 cases	DFT	RF	RF	Hydrogen adsorption on doped MoS2 nanostructures	118	Yes	No	Yes	No
Int. J. Hydrog. Energy, 2022, 47, 31321-31329	Chalcogenides	Single-atom TM doped on chalcogenide catalysts	Not Mentioned	Atom radius, Pauli electronegativity, d electrons number, the first ionization energy, and band gap etc.	DFT-calculated Gibbs free energy of H binding	The band gap of support material	Supervised Learning | Regression	Data points from previous works	DFT	MLP	MLP	ML-guided design and screening of chalcogenide catalysts for hydrogen evolution reaction	119	No	Yes	No	Yes
Sci. Rep., 2023, 13, 12729	Chalcogenides	2D TMDC	Not Mentioned	27 features including radius of the covalent bond of the chalcogen element, average valence electron number of TM-X bond, distance to the outermost electron of the TM element etc.	DFT-calculated Gibbs free energy of H binding	The radius of the covalent bond of the chalcogen element, the average valence electron number of the TM-X bond, the distance to the outermost electron of the transition metal element	Supervised Learning | Regression | Genetic Descriptor Search	Dataset comprises 70 TMDCs	DFT	Ridge regression combined with GA for searching	Ridge regressor	Genetic descriptor search algorithm for predicting hydrogen adsorption free energy of 2D material	120	Yes	No	Yes	No
J. Phys. Chem. Lett., 2021, 12, 2102-2111	Chalcogenides	2D TMDC	Alkaline	27 types of features including local electronegativity, valence electron numbers etc. Feature screening is conducted to recognize the 5 decisive features	DFT-calculated Gibbs free energy of H binding	Nearest neighbor local electronegativity; Average valence electron number of TM-X; First ionization energy of transition metal; Covalent radius of transition-metal atom; Next-nearest neighbor local electronegativity	Supervised Learning | Regression	46 initial 2D-TMDC materials for screening	DFT	RF and single-hidden-layer neural network	MLP	Identifying Metallic Transition-Metal Dichalcogenides for Hydrogen Evolution through Multilevel High-Throughput Calculations and Machine Learning	121	Yes	Yes	No	No
Int. J. Energy Res., 2023, 2023, 6612054	Chalcogenides	TMDCs specifically TM-doped MX2 (CrS2, MoS2, WS2, MoSe2, and MoTe2) and systems exhibiting stable 2H-phase TMD structures like Rh@WSe2.	Not Mentioned	28 types of atomic features for TM, M, and X are used as input features, including specifics like the number of valence electrons of the dopant, the distance of the valence electron of the dopant, the Miedema parameter of the dopant etc.	DFT-calculated Gibbs free energy of H binding	The number of valence electrons of the dopant	Supervised Learning | Regression	150 training datasets in tandem with DFT calculations, as well as 15 arbitrary systems with DFT-calculated values for an external test set	DFT	12 ML algorithms with RF, GBDT, ridge regression, SVM, and ET highlighted	GBDT	Machine Learning for the Expedited Screening of Hydrogen Evolution Catalysts for Transition Metal-Doped Transition Metal Dichalcogenides	122	Yes	Yes	No	No
J. Mater. Chem. A, 2023, 11, 9964-9975	Chalcogenides	2D TMDCs, with a focus on W(1−x)VxS2 alloys and other 2H–MX2 alloys (M = Cr, Mo, W, V, Nb, Ta, Ti, Zr, Hf; X = S, Se).	Not Mentioned	29 features including the atomic number (Z), the Pauling electronegativity (χ), the Gibbs free energy of hydrogen adsorption on pristine MX2 (ΔGH−MX2), and additional descriptors for the chalcogen atoms	DFT-calculated Gibbs free energy of H binding	Not mentioned	Supervised Learning | Regression	Initial dataset was over 1140 DFT-calculated adsorption configurations, which were selected from 8496 generated alloy configurations based on 18 MX2 pristine structures	DFT	GBDT, RF	GBDT	Basal plane activation of two-dimensional transition metal dichalcogenides via alloying for the hydrogen evolution reaction: first-principles calculations and machine learning prediction	123	Yes	No	Yes	No
J. Phys. Chem. Lett., 2020, 11, 869-876	Chalcogenides	2D van der Waals heterostructured TMDC	Not Mentioned	4 Features: the cosine of the rotational angle , the distance between two secondary parts, the average bond length of MX2, and the ratio of the bandgaps	DFT-calculated Gibbs free energy of H,OH,OOH binding	Combined descriptor	Supervised Learning | Regression	192 data points were derived from 48 optimized systems	DFT	LASSO	LASSO	Predicted optimal bifunctional electrocatalysts for the hydrogen evolution reaction and the oxygen evolution reaction using chalcogenide heterostructures based on machine learning analysis of in silico quantum mechanics based high throughput screening	124	Yes	No	Yes	No
ACS Appl. Mater. Interfaces 2023, 15, 27995–28007	Chalcogenides	Low-dimensional Heterostructures specifically TMDC materials like MoS2, MoSe2, NbS2, NbSe2, and their combinations with oxides and nitrides such as ZnO, AlN, GaN, like NbS2/ZnO, NbSe2/ZnO, MoS2/ZnO, MoSe2/ZnO, MoS2/AlN, TaS2/ZnO, and TaS2/AlN.	Not Mentioned	46 features including positions of potential hydrogen adsorption sites, Periodic Column, Electron Affinity, Average Ionization Potential etc.	DFT-calculated Gibbs free energy of H binding	Average Ionization Potential	Supervised Learning | Regression and Classfication	184 DFT calculated datapoints	DFT	LightGBM	LightGBM	Enhanced Hydrogen Evolution Performance at the Lateral Interface between Two Layered Materials Predicted with Machine Learning	127	Yes	No	Yes	No
J. Am. Chem. Soc. 2018, 140, 4678–4683	Phosphides	Ni2P surfaces, specifically the Ni3P2(0001) termination and its nonmetal-doped variants. The study also extends to Ni2P that expresses the Ni3 motif	Not Mentioned	30+ input features span a variety of structural and charge descriptors, including Ni–Ni bond lengths, Ni–Ni–Ni bond angles, Löwdin charges, elemental data, and other geometric parameters like the perimeter and area of Ni3-hollow sites	DFT-calculated Gibbs free energy of H binding	Average Ni–Ni bond length	Supervised Learning | Regression	55 observations (structures)	DFT	RF	RF	Chemical Pressure-Driven Enhancement of the Hydrogen Evolving Activity of Ni2P from Nonmetal Surface Doping Interpreted via Machine Learning	129	Yes	No	Yes	No
J. Phys. Chem. C, 2020, 124, 10483-10494	Phosphides	Amorphous Ni2P	Not Mentioned	Varied across models but includes 20 symmetry functions, 21 atom-pair distances, Efrozen, Erelax, and three ΔEi values (i = 1, 2, 3).	DFT-calculated H binding energy splitted in frozen and relaxed	The bond distances between nickel atoms and the adsorption site	Supervised Learning | Regression	Over 600 amorphous surfaces	DFT	GBDT and MLP	MLP	Amorphous catalysis: machine learning driven high-throughput screening of superior active site for hydrogen evolution reaction	130	Yes	Yes	No	No
Front. Chem., 2019, 7, 444	Phosphides	Ni5P4	Not Mentioned	Bond number, position, and length etc.	DFT-calculated Gibbs free energy of H binding	Bond number and position of neighbors	Supervised Learning | Classification	DFT calculated points, size not mentioned	DFT	MLP and Support vector machine (SVM)	SVM	Catalytically Active Sites on Ni5P4 for Efficient Hydrogen Evolution Reaction From Atomic Scale Calculation	131	Yes	Yes	No	No
J. Energy Chem., 2023, 82, 307-316	Phosphides	CoP and its various ion-doped versions including Al-CoP, V-CoP, Mo-CoP	Alkaline	7 important descriptors after Pearson correlation analysis (feature engineering) include ΔΦ (work function difference), covalent radii, first ionization energy, relative atomic mass, Allen’s electronegativity etc.	DFT-calculated Gibbs free energy of H binding	Work function difference, d-band center	Supervised Learning | Regression | Symbolic Regression	DFT calculated points, size not mentioned	DFT with experimental synthesize and validation	GP-GOMEA for symbolic regression	GP-GOMEA	Design of high-performance ion-doped CoP systems for hydrogen evolution: From multi-level screening calculations to experiment	133	Yes	No	Yes	No
Mol. Catal., 2023, 548, 113402	Phosphides	Ternary TM Phosphides	Not Mentioned	(After feature engieerning) 8 key features were retained, including the geometric mean of P orbital electron number, atomic volume of metal and doping, and the geometric mean of first ionization energy etc.	DFT-calculated Gibbs free energy of H binding	Geometric mean of P orbital electron number	Supervised Learning | Regression	60 published papers on binary and ternary phosphides, along with an additional 50 ΔGH data points from the authors' own calculations and experiments	DFT	RF, KNN regressor,KR, SVM, and linear regression. Ensemble learning combining these algorithms is also employed	RF	Accelerating the design and optimization of catalysts for the hydrogen evolution reaction in transition metal phosphides using machine learning	134	Yes	No	Yes	No
Appl. Surf. Sci., 2022, 606, 154945	Carbides and Borides	3d, 4d, and 5d group TM atoms anchored on a phosphorus carbide (PC3) monolayer	Acidic	10 features including the first ionization energy, the TM−H bond length, d band center, electronegativity, electron affinity,first ionization energy, covalent radius etc.	DFT-calculated Gibbs free energy of H binding	First ionization energy, TM−H bond length, d band center	Supervised Learning | Regression	26 sets of data	DFT	GBDT, AdaBoost, Linear Regression, MLP, and RF	GBDT	Transition metal single-atom supported on PC3 monolayer for highly efficient hydrogen evolution reaction by combined density functional theory and machine learning study	135	Yes	Yes	No	No
ACS Appl. Mater. Interfaces 2023, 15, 40538–40548	Carbides and Borides	TM atoms doped in a carbon-boron substrate (C3B monolayer)	Acidic	8 features including number of d electrons, electronegativity, atomic radius etc.	DFT-calculated Gibbs free energy of O, OH, OOH, H binding (both HER and OER are investigated)	Number of d electrons	Supervised Learning | Regression	15 DFT calculated points	DFT	GBDT	GBDT	Metal-Doped C3B Monolayer as the Promising Electrocatalyst for Hydrogen/Oxygen Evolution Reaction: A Combined Density Functional Theory and Machine Learning Study	136	Yes	No	Yes	No
Int. J. Quantum Chem., 2022, 123, e27055	MXenes	single atom loaded 2D Mxenes	Not Mentioned	49 initial features were considered, including easily accessible elemental properties like ionic radius, atomic number, ionization potentials, electron affinities, and d-band characteristics, Bader charge transfer, and atomic radius etc. Feature engineering reduced these to 32, and the final model used the 8 most significant features.	DFT-calculated Gibbs free energy of H binding and per-atom cohesive energies	Molar volume of surface element; Atomic radius of single atom; Boiling point of surface element; Thermal neutron capture of surface element; Ionic radius of surface group element; Atomic radius of surface element	Supervised Learning | Regression	264 different structures generated through DFT calculations	DFT	MLP, RF, SVM, LASSO, and KNN	MLP	A study of two-dimensional single atom-supported MXenes as hydrogen evolution reaction catalysts using density functional theory and machine learning	138	Yes	Yes	No	No
J. Mater. Chem. A, 2022,10, 18195-18205	MXenes	2D Mxenes	Not Mentioned	18 primary descriptors associated with elemental and geometrical properties	DFT-calculated Gibbs free energy of H binding	The Fermi level and the bond length	Supervised Learning | Regression | Symbolic Regression	54 DFT-calculated data points as training set	DFT	KR, SVM, GPR	KR	A descriptor for the design of 2D MXene hydrogen evolution reaction electrocatalysts	139	Yes	No	Yes	No
Phys. Rev. Materials, 2023, 7, 085801	MXenes	TM-doped Mo2CO2 Mxenes	Not Mentioned	Five descriptors as input features: Fermi level, d-band center of STM atom, Bader charge of M0 atom under the absorption site, Bader charge of STM atom, and the variation of STM in the z-axis	DFT-calculated Gibbs free energy of H binding	The d-band center of the single transition metal atom	Supervised Learning | Regression	54 random samples	DFT	KR, GP	KR	Regulation mechanisms of electron-delocalized single transition metal-doped Mo2CO2 MXene hydrogen evolution reaction catalysts	140	Yes	No	Yes	No
Appl. Surf. Sci., 2020, 526, 146522	MXenes	MBenes and Mxenes	Not Mentioned	21 features for structure and electronic description, including the atomic mass of the metal and doping atom	DFT-calculated Gibbs free energy of H binding	Bader charge transfer of the surface metal, the ratio of layers, lattice parameters, and valence electron numbers of the metal	Supervised Learning | Regression	180 MBenes systems	DFT	LASSO, RF, KR, SVM	SVM	Machine-learning-accelerated screening of hydrogen evolution catalysts in MBenes materials	141	Yes	No	Yes	No
J. Mater. Chem. A, 2020,8, 23488-23497	MXenes	2D MXenes	Not Mentioned	5 features including bond length of surface oxygen and surface metal atoms, the distance between the nearest neighbor O atoms, ionization energy difference, average value of affinity energy, and valence electron number	DFT-calculated H binding energy	The bond length of surface oxygen and surface metal atoms and the distance between the nearest neighbor O atoms	Supervised Learning | Regression	High-throughput DFT calculations from 2520 candidates	DFT	SVM, GPR, RF, and AdaBoost	AdaBoost	Accelerating 2D MXene catalyst discovery for the hydrogen evolution reaction by computer-driven workflow and an ensemble learning strategy	142	Yes	No	Yes	No
J. Mater. Chem. A, 2023,11, 8091-8100	MXenes	MM′XT2-type MXenes, where M/M′ can be elements like Sc, Ti, V, Cr, Mn, Y, Zr, Nb, Mo or W; X can be B, C or N; and T can be O, F, Cl or S	Not Mentioned	15 features after engieerning including a variety of atomistic, structural, electronic, and surface features	DFT-calculated Gibbs free energy of H binding	The number of valence electrons , electron affinity , and d-band center varianc	Supervised Learning | Regression	1125 MM′XT2-type Mxenes	DFT	9 algorithms including: AdaBoost, Elastic Net, GBDT, KNN, KR, Lasso, Partial Least Squares, RF, ridge regressor	GBDT	Fusing a machine learning strategy with density functional theory to hasten the discovery of 2D MXene-based catalysts for hydrogen generation	143	Yes	No	Yes	No
J. Phys. Chem. C 2020, 124, 13695–13705	MXenes	S-terminated carbide and nitride Mxenes	Not Mentioned	24 primary features were chosen initially with DFT-calculated and simple elemental information, which were later reduced to 20 and then further narrowed down to 13 features	DFT-calculated Gibbs free energy of H binding	Electronegativity of T , atomic mass of T; radius and Bader charge of M and X	Supervised Learning | Regression	132 MXenes (66 bare and 66 S-terminated) generated by DFT calculations	DFT	Elman MLP, SVM, KR, and RF	RF	High-Throughput Screening of Hydrogen Evolution Reaction Catalysts in MXene Materials	144	Yes	Yes	No	No
ACS Appl. Mater. Interfaces 2021, 13, 43, 50878–50891	Pnictides	MA2Z4, with a specific focus on NbSi2N4 and VSi2N4	Not Mentioned	253 features derived from 69 primary features like atomic number, valence, electronegativity, etc; various subsets of these features for different ML algorithms	DFT-calculated Gibbs free energy of H binding	The Bader charge transfer and py orbital electron number of Z below the Fermi energy	Supervised Learning | Regression	276 MA2Z4 compounds	DFT	SVM, KR, RF, XGBoost, LASSO, and MLP	GP-processed XGBoost	Symbolic Transformer Accelerating Machine Learning Screening of Hydrogen and Deuterium Evolution Reaction Catalysts in MA2Z4 Materials	145	Yes	Yes	No	No
J. Energy Chem., 2023, 78, 268-276	Pnictides	stable β phase 2D-arsenene	Not Mentioned	17 statistical elemental properties: mean atomic weight of constituent elements, mean periodic table row and column number, mean and range of atomic number, mean and range of atomic radius, mean and range of electronegativity, mean number of valence electrons in each orbital, and fraction of total valence electrons in each orbital	DFT-calculated Gibbs free energy of H binding	The maximum difference of electronegativity of the atoms	Supervised Learning | Classification	126 structures, Data is augmented using SMOTE to increase the whole data entries to a balanced 176 datapoints	DFT	Logistic Regression, SVM, DT, and GBDT	GBDT	An ensemble learning classifier to discover arsenene catalysts with implanted heteroatoms for hydrogen evolution reaction	146	Yes	No	Yes	No
J. Energy Chem., 2023, 81, 93-100.	2D GaPS4	SACs doped in 2D GaPS4	Not Mentioned	Electron affinity, first ionization energy, bond length, charge transfer between substrate and transition metal center, and electronegativity etc.	DFT-calculated Gibbs free energy of H binding	Electron affinity and first ionization energy	Supervised Learning | Regression	Dozens of structures with different TM atom types and numbers	DFT	GBDT , SVM, RF, KNN, and XGBoost	GBDT	Understanding the hydrogen evolution reaction activity of doped single-atom catalysts on two-dimensional GaPS4 by DFT and machine learning	147	Yes	No	Yes	No
ACS Energy Lett. 2020, 5, 2313–2321	Various 2D Materials	2D materials from 2DMatPedia database	Not Mentioned	The authors did not train ML models but direct did DFT calculations on high-throughput	DFT-calculated H Gibbs adsorption energy and its zero-point energy corrected value	None	No ML algorithm applied	2DMatPedia and includes around 2000 monolayers exfoliated from layered bulk materials	DFT	No ML algorithm applied	None	High-Throughput Identification of Exfoliable Two-Dimensional Materials with Active Basal Planes for Hydrogen Evolution	149	No	No	No	No
Energy Environ. Mater.2023,6, e12259	Various 2D Materials	2D materials range from V2Br5, AuBr2, CuBrO2, to CuSe among others, from 2DMatPedia database	Acidic	Based on CGCNN, which would include properties of atoms and bonds like group number, period number, electronegativity, covalent radius, valence electrons, first ionization energy, electron affinity, block, and atomic volume. Additional input features include the relationships between the atom at the adsorption site and the atoms adjacent to it in crystal structures	DFT-calculated Gibbs free energy of H binding	Not Mentioned	Supervised Learning | Classification and Regression | Transfer Learning	455 materials from 2DMatPedia	DFT	CGCNN	CGCNN	Deep Learning Accelerates the Discovery of Two-Dimensional Catalysts for Hydrogen Evolution Reaction	150	No	Yes	No	Yes

## Sheet: OER
Publication	Subsection	Investigated Material System	Electrolyte	Input Features	Output Target	Most Decisive Material Feature Identified	ML Paradigm	Dataset	Dataset Type	ML Algorithms	Best ML Algorithm	Title	Reference Number in Manuscript	Have Included Classical ML Algorithm	Have Included Neural Networks	Only Use Classical ML Algorithm	Only Use Neural Networks
J. Phys. Chem. Lett. 2016, 7, 3931–3935	Noble Metal-Based Oxides	IrO2 (also studied MoS2)	Not Mentioned	Electronic energies, free energies, and surface coverages	Free energy of all possible adsorbate coverages for catalyst surfaces	Coverage-dependent free energy	Supervised Learning | Regression | Active Learning (active learning-like feedback processes in choosing new configurations)	Containing approximately 90 nodes	DFT	GP	GP	Automated Discovery and Construction of Surface Phase Diagrams Using Machine Learning	161	Yes	No	Yes	No
Phys. Rev. Lett., 2020, 125, 206101	Noble Metal-Based Oxides	Rutile IrO2	Not Mentioned	Atomic environments present via SOAP kernel and a two-body kernel based on interatomic distances	Surface free energies	Not mentioned	Supervised Learning | Regression	136 structures calculated with QuantumESPRESSO and RPBE	DFT	GP for GAP	GP	IrO2 surface complexions identified through machine learning and surface investigations	162	Yes	No	Yes	No
ACS Catal. 2019, 9, 7651–7659	Noble Metal-Based Oxides	Ir oxides, including IrO2 and IrO3	Not Mentioned	Atomic geometries that are unrelaxed by DFT	DFT-calculated Gibbs free energy of O, OH, OOH binding	Not mentioned	Supervised Learning | Regression	800 and 1200 DFT calculations to determine coverages and calculate OER overpotentials of Ir oxides	DFT	CNN	CNN	Toward a Design of Active Oxygen Evolution Catalysts: Insights from Automated Density Functional Theory Calculations and Machine Learning	163	No	Yes	No	Yes
Chem. Mater. 2020, 32, 5854–5863	Noble Metal-Based Oxides	polymorphs of IrO2 and IrO3	Acidic	10 features via PCA on a 271-length fingerprint vector obtained by a structure featurization scheme based on Voronoi tessellation	Formation enthalpy	Not mentioned	Supervised Learning | Regression | Active Learning	5 structures in each AL iteration	DFT	GP	GP	Active Learning Accelerated Discovery of Stable Iridium Oxide Polymorphs for the Oxygen Evolution Reaction	164	Yes	No	Yes	No
J. Chem. Phys., 2021, 155, 244107	Noble Metal-Based Oxides	IrO2 and RuO2, with a focus on low-index facets of rutile IrO2 and RuO2	Not Mentioned	Atomic coordinates, interatomic distances rij, SOAP representation, and specific two-body distances between atomic species like M–M, M–O, and O–O.	Total energies, force components on all atoms of the training structures, surface free energies, and atom pair potentials or atom binding energy curves	Not mentioned	Supervised Learning | Regression	80 structures for IrO2 and 63 structures for RuO2 beyond the initial 32 surface structures	DFT	GP for GAP	GP	Data-efficient iterative training of Gaussian approximation potentials: application to surface structure determination of rutile IrO2 and RuO2	165	Yes	No	Yes	No
Nanomaterials 2023, 13, 10	Noble Metal-Based Oxides	Cation-disordered rocksalt Li1.22Ru0.61Ni0.16O2 and Li1.22Ru0.61Na0.05Ni0.10O2	Alkaline	Machine learning potential to accelerate the structure search with a sparse Gaussian process potential algorithm, as implemented in the AutoForce package	Machine learning potential to accelerate the structure search with a sparse Gaussian process potential algorithm, as implemented in the AutoForce package	Not mentioned	Supervised Learning | Regression	Experimental study, ML only applied in ML potential in DFT computation part	Experimental study, ML only applied in ML potential in DFT computation part	GP	GP	Reduced Potential Barrier of Sodium-Substituted Disordered Rocksalt Cathode for Oxygen Evolution Electrocatalysts	166	Yes	No	Yes	No
JACS Au 2023, 3, 1131–1140	Noble Metal-Based Oxides	primarily IrO2, with extensions to RuO2 and MnO2, focusing on metastable phases like C2/m-IrO2 and P62–IrO2	Not Mentioned	Atomic numbers encoded into a 128-dimensional dense vector for every constituent atom, bond length, and adjacent matrix in the crystal	Formation energies of IrO2 configurations, enthalpies of IrO2 structures, and the overpotential of the OER, denoted as the difference between Gibbs free energy of O and OH (ΔGO* – ΔGOH*) among others	Dynamically updated atomic attributes	Supervised Learning | Regression | Transfer Learning applied for RuO2 and MnO2 based on IrO2 models	Initial dataset containing 3000 IrO2 structures	DFT	CrystalGNN, which includes a dynamic embedding layer to self-update atomic inputs during the training process	GNN	Accelerating the Discovery of Metastable IrO2 for the Oxygen Evolution Reaction by the Self-Learning-Input Graph Neural Network	167	No	Yes	No	Yes
ACS Catal. 2021, 11, 734–742	Noble Metal-Based Oxides	Various facets of doped IrO2 and RuO2	Not Mentioned	Algebraic expressions of 31 base quantities in the first part and 24 least-correlated primary features in the second part, including both electronic and geometric properties	DFT-calculated Gibbs free energy of O, OH, OOH binding	Width of the d-band; charge transfer energy; Filling of the eg orbital	Supervised Learning | Regression | Compressed Sensing	A total of 684 cases involving various doping atoms and facets	DFT	SISSO	SISSO	Data-Driven Descriptor Engineering and Refined Scaling Relations for Predicting Transition Metal Oxide Reactivity	175	Yes	No	Yes	No
J. Phys. Chem. C 2022, 126, 19091–19100	Noble Metal-Based Oxides	RuO2 particles on Fe-N-C	Alkaline	One-hot encoded categorical chemical bonds are used as input features, with 68 dimensions representing 68 types of chemical bonds	E1/2 for ORR and η10 for OER	Types of chemical bonds: For E1/2: La–O, C–N, Fe–N, and C–C; For E10: Mn–O, Ni–O, La–O, and Co–O	Supervised Learning | Regression	151 publicly reported studies	Experimental	GBDT, RF, SVM, Bayesian Ridge Regression, KNN, and AdaBoost	RF	Rational Design for Efficient Bifunctional Oxygen Electrocatalysts by Artificial Intelligence	176	Yes	No	Yes	No
Adv. Mater., 2023, 35, 2211497	Noble Metal-Based Oxides	Multimetallic alloy catalysts for efficient water splitting, involving elements Pt, Pd, Ru, Cu, Ni, Co, Sn, Fe	Acidic	8D composition vectors, where the dimensions denoted the mole fraction of Pt, Pd, Ru, Ni, Fe, Cu, Co, and Sn precursors before the carbothermal shock procedure	Experimental Measured η10 for both HER and OER	Not mentioned	Supervised Learning | Regression | Active Learning	110 experimental data points	Experimental	GP	GP	Exploring Optimal Water Splitting Bifunctional Alloy Catalyst by Pareto Active Learning	177	Yes	No	Yes	No
Nat. Catal., 2020, 3, 554–563	Earth-Abundant Metal Oxides	Spinel [Mn]T[Al0.5Mn1.5]OO4	Alkaline	The stoichiometric number of element in tetrahedral and octahedral sites, the electronegativity of each element, the ionic radii of elements in tetrahedral and octahedral sites, the valence electron numbers of each element, the atomic cutoff radius and the band centres in the zinc-blende and rock-salt structures	DFT estimated band centres of oxygen 2p, MO d, and MT d	Not mentioned	Supervised Learning | Regression	A comprehensive dataset with more than 300 spinel oxides calculated using DFT	DFT with experimental validation	RF	RF	Covalency competition dominates the water oxidation structure-activity relationship on spinel oxides	178	Yes	No	Yes	No
ChemElectroChem, 2022, 9, e202101679	Earth-Abundant Metal Oxides	Fe-based multimetal oxides, including various types such as four M-type hexaferrites, three Ruddlesden-Poppers, one brownmillerite, and one stuffed tridymite	Alkaline	Fe−O bond length, Fe−Fe interatomic distance, Fe−O−Fe bond angle, and Distortion index of FeO6 or FeO4 polyhedra	OER activity, with specific activities given in unit of mA cm−2 (obtained by experiments)	Fe−O bond length	Supervised Learning | Regression	24 kinds of Fe-based oxides as well as nine kinds of unreported Fe-based multimetal oxides and 15 kinds of previously reported Fe-based oxides	DFT for input but experimental for output	Multiple linear regression, LASSO, ridge regression, partial least-squares regression, and SVM	RF	Crystal Structures of Iron-Based Oxides and Their Catalytic Efficiencies for the Oxygen Evolution Reaction: A Trend in Alkaline Media	179	Yes	No	Yes	No
J. Mater. Chem. A, 2022, 10, 15975-15980	Earth-Abundant Metal Oxides	FeNiOxHy	Alkaline	Physical and calculative properties (Nd, γ, χ, ΔG1 to ΔG4, max(ΔGi), ESSI), with a total of nine features	Experimental measured η10 for OER	Max value of Gibbs free energies of key intermediates; electrochemical step symmetric index	Supervised Learning | Regression | Symbolic Regression	Experimentally obtained catalytic activity data from cyclic voltammetry tests on seven FeNiOxHy samples synthesized with different Fe and Ni contents	Experimental	Deep Symbolic Regression	Deep Symbolic Regression	Non-noble electrocatalysts discovered by scaling relations of Gibbs-free energies of key oxygen adsorbates in water oxidation	180	No	Yes	No	Yes
ACS Omega 2022, 7, 16, 14160–14164	Earth-Abundant Metal Oxides	(Ni-Fe-Co)Ox	Alkaline	10 physical features: valence electron number, relative atomic mass, atomic number, nonbonded atomic radius, covalent radius, first ionization energy, electron affinity, Pauling scale electronegativity, and outermost d-orbital electron number	Experimental measured η10 for OER	The first ionization energy and outermost d-orbital electron number	Supervised Learning | Regression	496 entries representing different (Ni-Fe-Co)Ox materials	Experimental	12 Classic ML algorithms including GBDT, RF, LASSO, elastic net, SVM etc. and MLP	RF	Prediction of Oxygen Evolution Activity for NiCoFe Oxide Catalysts via Machine Learning	181	Yes	Yes	No	No
ACS Catal. 2019, 9, 8383–8387	Earth-Abundant Metal Oxides	(Ni-Fe-Co-Ce)Ox	Not Mentioned	Composition of metal elements	Experimental measured η10 for OER	Not mentioned	Supervised Learning | Regression	More than 6000 individual catalysts from published dataset	Experimental	MLP, SVM, and KNN	SVM	Using Artificial Intelligence To Forecast Water Oxidation Catalysts	182	Yes	Yes	No	No
Chem. Sci., 2020,11, 2696-2706	Earth-Abundant Metal Oxides	Pseudo-quaternary metal oxide combinations from a set of six elements and focusing on catalysts containing 1 to 4 cation elements, including Ni and Fe oxides.	Alkaline	6-dimensional composition vectors	Electrocatalytic activity (OER overpotentials), Figure of Merit	Not mentioned	Supervised Learning | Regression | Active Learning (sequential learning claimed)	2121 unique catalysts per dataset	Experimental	RF, GP, and Linear Ensemble	RF	Benchmarking the acceleration of materials discovery by sequential learning	183	Yes	No	Yes	No
ACS Appl. Mater. Interfaces 2022, 14, 41141–41148	Earth-Abundant Metal Oxides	NiaCobFecX1–a–b–c	Alkaline	7 features including composition (Ni, Co, Fe, Cr, La), morphology, phase, pH value of the electrolyte, and the type of working electrode	Experimental measured η10 for OER	Not mentioned	Supervised Learning | Regression	88 instances after data cleaning	Experimental	RF	RF	Using Machine Learning to Predict Oxygen Evolution Activity for Transition Metal Hydroxide Electrocatalysts	184	Yes	No	Yes	No
Phys. Chem. Chem. Phys., 2023,25, 7917-7926	Earth-Abundant Metal Oxides	Layered Double Hydroxides	Alkaline	Various properties related to LDHs, such as chemical composition, structure, morphology, electrode type, support, and testing conditions	Electrochemical double-layer capacitance of LDHs	Presence of Ce	Supervised Learning | Regression	∼130 data instances	Experimental	14 different common ML algorithms: from ridge regression, SVM to ensemble methods like RF, XGBoost, and also MLP	MLP	Analysis of the oxygen evolution activity of layered double hydroxides (LDHs) using machine learning guidance	185	Yes	Yes	No	No
J. Am. Chem. Soc. 2023, 145, 4065–4080	Earth-Abundant Metal Oxides	CoxFe3–xO4 nanocatalysts	Alkaline	XAS spectra	The partial bond length distributions (partial radial distribution functions)	Local structural transformations and oxidation states of tetrahedrally and octahedrally coordinated metal sites	Supervised Learning | Regression	EXAFS spectra	Experimental	MLP	MLP	Deciphering the Structural and Chemical Transformations of Oxide Catalysts during Oxygen Evolution Reaction Using Quick X-ray Absorption Spectroscopy and Machine Learning	186	No	Yes	No	Yes
Adv. Func. Mater., 2023, 35, 2306889	Earth-Abundant Metal Oxides	FeCoNiMoAl-based HEA	Alkaline	First-principal–based high-dimensional neutral work potential	First-principal–based high-dimensional neutral work potential	Not mentioned	Supervised Learning | Regression	Experimental study, ML only applied in first-principal–based high-dimensional neutral work potential to speed up the DFT-MD computational part	Experimental study, ML only applied in ML potential in DFT computation part	High-dimensional neutral work potential: MLP	MLP	Cost-Effective High Entropy Core–Shell Fiber for Stable Oxygen Evolution Reaction at 2 A cm−2	187	No	Yes	No	Yes
Adv. Mater., 2022, 35, 2207466	Earth-Abundant Metal Oxides	9-element HEA including Ti, Cr, Mn, Fe, Co, Ni, Zr, Nb, and Mo	Acidic	Machine-learning force fields	Machine-learning force fields	Not mentioned	Supervised Learning | Regression	Experimental study, ML only applied in machine-learning force fields generated from DFT-MD simulations for theoretical computation part	Experimental study, ML only applied in ML potential in DFT computation part	GP	GP	Corrosion-Resistant and High-Entropic Non-Noble-Metal Electrodes for Oxygen Evolution in Acidic Media	188	Yes	No	Yes	No
J. Phys. Chem. C 2016, 120, 1, 78–86	Advanced Oxide Systems	ABO3 Perovskites	Alkaline	14 descriptors encompassing electronic, structural, and energetic properties of the oxides.	Experimental Measured OER overpotential	Electron occupancy and covalency	Supervised Learning | Regression	101 observations of 51 perovskites from literature and the authors' own experimental data	Experimental	5 linear regression algorithms, including simple ordinary least-squares regression, ridge, LASSO	Least Angle Regression	Descriptors of Oxygen-Evolution Activity for Oxides: A Statistical Evaluation	191	Yes	No	Yes	No
Appl. Surf. Sci. 2020, 531, 147323	Advanced Oxide Systems	ABO3 Perovskites	Not Mentioned	114 structural features by surface center-environment modeling	DFT-calculated Gibbs free energy of O, OH, OOH binding	Not mentioned	Supervised Learning | Regression	782 perovskite oxide structures (D610 + D172), where D610 represents 610 new hypothetical perovskite oxide structures created through substitutions at both A and B sites, and D172 consists of 172 data points, including 72 from the current work and 100 from literature	DFT	RF and SVM	RF	First-principles based machine learning study of oxygen evolution reactions of perovskite oxides using a surface center-environment feature model	192	Yes	No	Yes	No
Nat. Comm. 2020, 11, 3513	Advanced Oxide Systems	Perovskites	Alkaline	8 structural descriptors, including the number of d electrons for TM ions, electronegativity values, valence states, ionic radii, the tolerance factor, and the octahedral factor	Experimental Measured OER overpotential	Octahedral factor divided by tolerance factor	Supervised Learning | Regression | Symbolic Regression	1080 experimental data points from 18 samples	Experimental	Symbolic regression with genetic programming	Symbolic regression with genetic programming	Simple descriptor derived from symbolic regression accelerating the discovery of new perovskite catalysts	193	Yes	No	Yes	No
J. Phys.: Conf. Ser., 2022, 2393, 012019	Advanced Oxide Systems	Perovskites	Alkaline	Tolerance factor, Number of d electrons for TM ions, Electron occupancy, Ionic radius of element A and B etc.	Experimental Measured OER overpotential	Number of d electrons for TM ions, Ionic radius of B-site cation	Supervised Learning | Regression | Symbolic Regression	105 observations of perovskite electrocatalytic OER overpotential	Experimental	Symbolic regression	Symbolic regression	Symbolic regression assisted design of perovskite-type OER electrocatalysts for oxygen evolution reaction (OER) in alkaline electrolyte	194	Yes	No	Yes	No
ACS Catal. 2020, 10, 7, 4377–4384	Advanced Oxide Systems	AA′B2O6-type double perovskites	Not Mentioned	18-dimensional compositional properties of the compounds (e.g., atomic oxidation state, atomic electronegativity) and DFT-calculated bulk electronic structures	DFT-calculated Gibbs free energy of O, OH, OOH binding	For the *O model is ionic ratio of B/O sites, dzx filling, dxy filling, dxy center, pz kurtosis, and py center; for the *OH model is the ionic ratio of B/O sites, the ionic radius difference of B/O sites, dxy width, pz width, py center, and py kurtosis.	Supervised Learning | Regression | Active Learning	∼250 initial perovskite structures	DFT	GP	GP	An Adaptive Machine Learning Strategy for Accelerating Discovery of Perovskite Electrocatalysts	195	Yes	No	Yes	No
Mater. Horiz., 2023,10, 1651-1660	Advanced Oxide Systems	Oxide perovskites, specifically nickel-based and double perovskites	Alkaline	21 features after feature engineering, which included specific features like d electron number, first-ionization energy of the B site, valence of the A site, melting point of the B site, electronegativity of the B site, and first-ionization energy of the A site.	Experimental Measured OER overpotential and Current Density	d electron number , first-ionization energy of the B site, valence of the A site, melting point of the B site, electronegativity of the B site, and first-ionization energy of the A site	Supervised Learning | Regression | Symbolic Regression	6 multi-fidelity datasets totaling 163 data points collected from 13 publications	Experimental	Multi-task extension of symbolic regression	Multi-task extension of symbolic regression	Distilling universal activity descriptors for perovskite catalysts from multiple data sources via multi-task symbolic regression	196	Yes	No	Yes	No
J. Energy Chem., 2023, 80, 744-757	Advanced Oxide Systems	Pyrochlore-structured Ru- or Ir-containing oxides	Acidic	One-hot representation of compound elements	DFT calculated decomposition energy and oxygen 2p-band center	Not mentioned	Supervised Learning | Regression | Transfer Learning	A total of 88,742 inorganic compounds from the Materials Project	DFT	MLP, CNN, as well as non-deep learning models like lasso, ridge regression etc.	Transferring the first layer from the CNN architecture as the elemental representation and using GP for the ML2 model.	Transfer learning aided high-throughput computational design of oxygen evolution reaction catalysts in acid conditions	197	Yes	Yes	No	No
ACS Catal. 2023, 13, 3066–3084	Advanced Oxide Systems	Unary (AxOy) and binary (AxByOz) metal-oxides	Not Mentioned	Structures can contain a surface and adsorbate combination or just an isolated surface (slab). Some include oxide materials, coverages, and adsorbates based on DFT relaxations, the input descriptor are based on algorithm applied GemNet-OC, SchNet, DimeNet++, ForceNet etc.	Various Machine Learning Potential (DFT total energy and force for a given structure, DFT relaxed total energy, adsorption energies, surface energies, and reaction energies)	Not mentioned	Supervised Learning | Regression	62,331 DFT relaxations across various oxide materials	DFT	GemNet-OC, SchNet, DimeNet++, ForceNet, SpinConv, GNN, and PaiNN	GemNet-OC	The Open Catalyst 2022 (OC22) Dataset and Challenges for Oxide Electrocatalysts	198	No	Yes	No	Yes
Appl. Catal. B: Environ. 2022, 286, 135946	Basic Carbon Structures	Edge-doped graphene nanoribbons and N doped graphene systems	Not Mentioned	4 input features including electronic descriptors such as the density of states of π-orbital at Fermi level and its relative occupancy	DFT-calculated Gibbs free energy of O, OH, OOH binding	The density of states of π-orbital at the Fermi level and its relative occupancy	Supervised Learning | Regression	101 structures and corresponding DFT-calculated data points	DFT	MLR, RF, SVM	SVM	Energy parameter and electronic descriptor for carbon based catalyst predicted using QM/ML	200	Yes	No	Yes	No
J. Mater. Chem. A, 2020,8, 5663-5670	Basic Carbon Structures	TM SACs on graphene substrate	Not Mentioned	Electron numbers of the d orbital, oxide formation enthalpy, Pauling electronegativity of the central metal atom, sum of Pauling electronegativity of surrounding atoms etc.	DFT calculated limiting potentials for the ORR, OER, and HER	OER: Number of d electrons, oxide formation enthalpy, and Pauling electronegativity of the central metal atom; HER: Number of d electrons, hydride formation enthalpy, and oxide formation enthalpy; ORR: Number of d electrons, Pauling electronegativity of the central metal atom	Supervised Learning | Regression	104 graphene-supported SACs	DFT	RF	RF	Directly predicting limiting potentials from easily obtainable physical properties of graphene-supported single-atom electrocatalysts by machine learning	201	Yes	No	Yes	No
iScience 2021, 24, 102398	Basic Carbon Structures	TM SACs on graphene substrate	Acidic	5 structural descriptors: the atomic mass, atomic radius, d-electron count, electronegativity, and electron affinity	DFT-calculated ηOER	The d-electron count, atomic radius, and electron affinity	Supervised Learning | Regression	41 structures and DFT-calculated data points	DFT	MLP	MLP	Machine learning-accelerated prediction of overpotential of oxygen evolution reaction of single-atom catalysts	202	No	Yes	No	Yes
Energy Environ. Sci., 2021,14, 3455-3468	Basic Carbon Structures	SACs on nitrogen graphene (TM single atoms embedded in NxCy moieties)	Not Mentioned	Descriptors based on Coulomb matrix elements between M and neighboring C/N atoms, between M and adsorbent atoms (H/O), and between adsorbents and the closest non-metal surface atom (C/N), along with atomic numbers and atomic first ionization energy	Classification of whether |ηHER| < 0.2 V for HER and ηOER/ORR <1 V for OER/ORR	The Coulomb matrix for the distances from the TM to the coordinating C/N atoms and the first ionization potential of TM	Supervised Learning | Classification	210 double-vacancy configurations and corresponding DFT-calculated data points	DFT	10 ML algorithms, including Gaussian naïve Bayes, RF, GBDT, SVM, MLP etc.	RF	Tuning metal single atoms embedded in NxCy moieties toward high-performance electrocatalysis	203	Yes	Yes	No	No
J. Phys. Chem. C 2023, 127, 15246–15256	Basic Carbon Structures	TM-N-C SACs	Not Mentioned	Input features used are density matrix-based features derived from Hartree–Fock theory with a minimal basis set for a fixed geometry. The number of features varies depending on the DMBF dataset used, with some datasets containing 1482 elements and others containing 256 elements	DFT-calculated Gibbs free energy of O, OH, OOH binding	Not mentioned	Supervised Learning | Regression	1442 DFT-calculated samples	DFT	MLP	MLP	Density Matrix-Based Features as Descriptors for Oxygen Reduction and Evolution Catalysts	204	No	Yes	No	Yes
Adv. Funct. Mater.2022, 32, 2203439	Basic Carbon Structures	Double-atom catalysts on carbon surface	Not Mentioned	Multiple-level features between the transition metal atoms and substrate atoms	DFT Calculated OER/ORR overpotential	Atomic properties and Pauling electronegativity	Supervised Learning | Regression	164 data points	DFT	Graph convolutional neural network	Graph convolutional neural network	Data-Driven High-Throughput Rational Design of Double-Atom Catalysts for Oxygen Evolution and Reduction	205	No	Yes	No	Yes
Renew. Energy, 2023, 203, 445-454	Basic Carbon Structures	MN4-O-MN4 bifunctional catalysts on carbon substrate	Not Mentioned	Atomic size, atomic mass, atomic radius, electron counts, electron affinity, and ionization energy	DFT Calculated OER/ORR overpotential	ORR: First Ionization Energy of the upper TM atom; OER: Atomic Number in the periodic table of the upper TM atom	Supervised Learning | Regression	225 bilayer MN4-O-MN4 structures	DFT	GBDT, RF, SVM, KNR	GBDT	Bilayer MN4-O-MN4 by bridge-bonded oxygen ligands: Machine learning to accelerate the design of bifunctional electrocatalysts	206	Yes	No	Yes	No
ACS Sustainable Chem. Eng. 2021, 9, 9, 3590–3599	Carbon Nitrides	TM SACs anchored on g-C3N4 with N vacancy	Not Mentioned	10 descriptors related to structural and atomic properties including the bond length of TM and coordination atoms, d-band center, and charge transfer of TM atoms etc.	DFT-calculated Gibbs free energy of OH binding	First Ionization Energy and Charge Transfer of TM atoms	Supervised Learning | Regression	16 DFT-calculated structures	DFT	GBDT	GBDT	Single-atom rhodium on defective g-C3N4: a promising bifunctional oxygen electrocatalyst	207	Yes	No	Yes	No
J. Mater. Chem. A, 2021,9, 16860-16867	Carbon Nitrides	TM SACs anchored on C2N monolayers	Not Mentioned	8 structural descriptors, including the TM atomic number, outer electron number, electronegativity, Single-atom oxide formation enthalpy etc.	DFT-calculated Gibbs free energy of O binding	Single-atom oxide formation enthalpy	Supervised Learning | Regression	54 DFT-calculated structures	DFT	RF	RF	Unravelling the origin of bifunctional OER/ORR activity for single-atom catalysts supported on C2N by DFT and machine learning	208	Yes	No	Yes	No
Chem. Eng. J. 2022, 440, 133126	Carbon Nitrides	SACs anchored on carbon-nitride-related and CxNy, phthalocyanine, nitrogen-coordination graphene	Acidic	2 systematic descriptors, 3 atomic descriptors and 6 electronic descriptors, including features such as electron number of the d orbital	DFT Calculated OER/ORR overpotential	Electron number of the d orbital	Supervised Learning | Regression	84 different CxNy-based SACs	DFT	GBDT, RF, SVM, GP, and KNN	RF	Revealing the oxygen Reduction/Evolution reaction activity origin of Carbon-Nitride-Related Single-Atom catalysts: quantum chemistry in artificial intelligence	209	Yes	No	Yes	No
J. Mater. Chem. A, 2022, 10, 11600	Carbon Nitrides	Biatom anchored on g-CN substrate	Acidic	10 structural descriptors: including the distance of two metal atoms, average bond length, Covalent radius etc.	DFT-calculated Gibbs free energy of H binding and OER/ORR overpotential	The distance of two metal atoms, average bond length, Covalent radius	Supervised Learning | Regression	276 DFT-calculated structures, 23 homonuclear and 253 heteronuclear	DFT	RF	RF	Building up the "Genome" of bi-atom catalysts toward efficient HER/OER/ORR	210	Yes	No	Yes	No
J. Mater. Chem. A, 2022,10, 22500-22511	MXenes	Ni, Fe, and Cu doped Mxenes	Not Mentioned	DFT-derived descriptors like stability, adsorption free energies of intermediates, and electronic and structural descriptors	Overpotential η ≤ 0.2 V, 0.5 V, and 0.8 V for the HER/OER/ORR (DFT Calculated)	Embedding energy, bulk cohesive energy, and Adsorption free energies	Supervised Learning | Classification	∼220 Ni-doped M2M′X2O2 type Mxenes	DFT	CatBoost, Bagging and RF	CatBoost	Doped MXene combinations as highly efficient bifunctional and multifunctional catalysts for water splitting and metal–air batteries	211	Yes	No	Yes	No
Appl. Surf. Sci., 2023, 628, 157225	MXenes	MXene-based SACs	Not Mentioned	13 features that consider aspects like atomic and substrate structure, electronic properties, and environmental characteristics	DFT Calculated OER/ORR overpotential	ORR: adsorption energy of *OH, binding energy of Pt on substrate, d-band center of Pt atom, and hydride formation enthalpy;similar for OER, with d-band center added	Supervised Learning | Regression	42 MXenes-based SACs	DFT	RF, XGBoost	XGBoost	Machine learning-assisted exploration of the intrinsic factors affecting the catalytic activity of ORR/OER bifunctional catalysts	212	Yes	No	Yes	No
ACS Appl. Nano Mater. 2023, 6, 7694–7703	MXenes	M-N4-Gr/MXene heterostructures, specifically hybridized M-doped N-ligand graphene with MXene (Ti2C, Nb2C, and V2C) heterostructures	Not Mentioned	12 features related to atomic structural characteristics, electronic structural features, and environmental structural features. These include variables like the charge transfer amount (Q), d-band center (εd), and the atomic radius (r), among others	DFT Calculated OER/ORR overpotential	The d band center of the metal active site	Supervised Learning | Regression	28 DFT-calculated structures	DFT	5 ML algorithms: GBDT, RF, GP, KNN, SVM	RF	M-N4-Gr/MXene Heterojunction Nanosheets as Oxygen Reduction and Evolution Reaction Catalysts: Machine Learning and Density Functional Theory Insights	213	Yes	No	Yes	No
Inorg. Chem. Front., 2022, 9, 4272-4280	Exotic Systems	TM doped 2D GaPS4	Not Mentioned	Bond angles, highest occupied orbitals of the doped transition metal atoms, number of d electrons, bond length, and electronegativity	DFT Calculated OER/ORR overpotential	The number of d electrons, the bond length, and electronegativity	Supervised Learning | Regression	17 DFT-calculated structures	DFT	RF	RF	Strain engineering in single-atom catalysts: GaPS4 for bifunctional oxygen reduction and evolution	214	Yes	No	Yes	No
Nanoscale, 2023,15, 11616-11624	Exotic Systems	TM anchored on MnPS3 monolayer	Not Mentioned	8 features including Bond length of TM atoms and adsorbed O species, the number of d electrons, the d-band center, the first ionization energy, the radius of TM atoms, electronegativity, charge transfer of TM atoms	DFT-calculated Gibbs free energy of OH binding	The number of d electrons	Supervised Learning | Regression	16 DFT-calculated structures	DFT	6 ML algorithms including Ridge, Elastic Net, Kernel Ridge etc.	RF	Machine-learning-accelerated screening of single metal atoms anchored on MnPS3 monolayers as promising bifunctional oxygen electrocatalysts	215	Yes	No	Yes	No
Molecules, 2021, 26, 6362	Exotic Systems	molecular catalysts composed of different combinations of Cr, Mn, and Fe metals	Not Mentioned	Reduced autocorrelation functions based on atoms' electronegativity, covalent radius, polarizability, and nuclear charge	DFT-calculated Gibbs free energy of O, OH binding	Not mentioned	Supervised Learning | Regression	251 DFT-calculated structures	DFT	GP	GP	Applying active learning to the screening of molecular oxygen evolution catalysts	216	Yes	No	Yes	No
ACS Sustainable Chem. Eng. 2022, 10, 14, 4561–4578	MEA Perspective	MEA engineering parameters	Acidic	MEA synthesis, engineering, and testing paramters, Ir and Ru weight percentages are related to electrocatalysts design	Experimental Measured Current density at different voltage; stability decay rate	Temperature, catalyst composition, ionomer content, catalyst loading, and membrane properties	Supervised Learning | Regression	578 entries for current density and 87 for stability, from 122 research papers	Experimental	9 different common ML algorithms including XGBoost, RF, GBDT, and MLP	GBDT	Guiding the Optimization of Membrane Electrode Assembly in a Proton Exchange Membrane Water Electrolyzer by Machine Learning Modeling and Black-Box Interpretation	221	Yes	Yes	No	No
Int. J. Hydrogen Energy 2022, 47, 2134-2151	MEA Perspective	MEA engineering parameters	Acidic	108 features from the literature including parameters for electrocatalysts, etc.	Experimental Measured Current density	Cathode surface Ni mole fraction, Anode surface Co mole fraction,	Supervised Learning | Classification	789 entries from 30 research papers	Experimental	Decision Tree	Decision Tree	Analysis and modeling of high-performance polymer electrolyte membrane electrolyzers by machine learning	223	Yes	No	Yes	No

## Sheet: HOR&ORR
Publication	Subsection	Investigated Material System	Electrolyte	Input Features	Output Target	ML Paradigm	Most Decisive Material Feature Identified	Dataset	Dataset Type	ML Algorithms	Best ML Algorithm	Title	Reference Number in Manuscript	Have Included Classical ML Algorithm	Have Included Neural Networks	Only Use Classical ML Algorithm	Only Use Neural Networks
HOR
Angew. Chem.Int. Ed.2023,62, e2022179	HOR	HEA-NiPdRuIrRh or HEA-PdNiRuIrRh	Alkaline	Spatial and chemical descriptors genereated by DeePMD-kit	ML Potential via DeePMD-kit predicting force and energy	Supervised Learning | Regression	Pd−Pd−Ni/Pd−Pd−Pd bonding environments and Ni/Ru oxophilic sites	Start at 1000	DFT	MLP (DeepMD use fully connected MLPs)	MLP	Understanding Alkaline Hydrogen Oxidation Reaction on PdNiRuIrRh High-Entropy-Alloy by Machine Learning Potential	227	0	1	0	1
ACS Sustainable Chem. Eng. 2022, 10, 16299–16312	HOR	Alloy particles including Pt, Pd, or Rh etc.	Alkaline	The work function, metal-oxide bond enthalpy, reduction potential, ionization energy, and percentages of elements such as Pt, Ni, Cu, and Rh	Experimental Measured onset potential of the HOR	Supervised Learning | Regression	The product of the average work function and the average metal oxide bond enthalpy	1584 catalyst samples	Experimental	MLP, GBDT, and Bayesian Ridge model with Automatic Relevance Determination	MLP	High-Throughput Fluorescent Screening and Machine Learning for Feature Selection of Electrocatalysts for the Alkaline Hydrogen Oxidation Reaction	228	1	1	0	0
ORR
ACS Omega 2021, 6, 27, 17424–17432	Pure Pt	Pt nanoparticles and Pt surfaces interacting with O atoms	Not Mentioned	20 descriptors related to geometrical and electronic properties but screened out key 5 descriptors which are element-based generalized coordination numbers	DFT-calculated Gibbs free energy of O binding	Supervised Learning | Regression	4 generalized coordination numbers	155 unique adsorption sites	DFT	Multiple regression analysis	Multiple regression analysis	Density Functional Theory and Machine Learning Description and Prediction of Oxygen Atom Chemisorption on Platinum Surfaces and Nanoparticles	237	1	0	1	0
Mater. Chem. Phys. 2020, 253, 123407	Pure Pt	Pt surfaces, specifically the 100, 110, and 111 faces of Pt metal using ML potential	Not Mentioned	Features extracted by atomistic machine learning package (amp), including distance and dihedral angles between atoms, as well as rotational and translation symmetries	Machine Learning Potential for DFT calculated energies & forces	Supervised Learning | Regression	d orbital states and p orbital states	32 structures for bulk Pt	DFT	MLP with Amp and ænet	MLP	Application of the training of density functional theory potentials within machine learning to adsorptions and reaction paths on Platinum surfaces	240	0	1	0	1
Chem. Sci., 2023,14, 3913-3922	Pure Pt	gold–water interface, specifically focusing on the Au(100) surface	Not Mentioned	polarizable atom interaction neural network model, where all atoms in a configuration are treated as nodes in a graph, and their connections are processed by message and update functions to calculate atomic energy and scalar properties	Machine Learning Potential for DFT calculated energies & forces	Supervised Learning | Regression | Active Learning	Not Mentioned	initial dataset with 5000 reference structures	MD	PaiNN	PaiNN	Neural network potentials for accelerated metadynamics of oxygen reduction kinetics at Au–water interfaces	241	0	1	0	1
J. Appl. Phys. 2020, 128, 014301	Pure Pt	Pt nanoparticles	Not Mentioned	121 dimensions derived from 179 structural features based on atomic, crystallographic, and topological descriptors	Regression: the normalized concentration of surface microstructures and surface facets; classification: ordered or disordered	Unsupervised learning: clustering; Supervised Learning | Regression and Classification	Disordered: coordination numbers and particle size; Ordered: concentration of surface atoms with certain coordination numbers	1300 MD generated structures	MD	ILS, extra tree (regressor &classifier)	ET	Classification of platinum nanoparticle catalysts using machine learning	242	1	0	1	0
Nanotechnology 2021, 32, 095404	Pure Pt	Pt nanoparticles	Not Mentioned	121 dimensions derived from 179 structural features based on atomic, crystallographic, and topological descriptors	Clustering for identifying archetypes of Pt NPs	Unsupervised learning: clustering; Supervised Learning | Regression	Not Mentioned	MD generated structures of 1300 unique platinum nanoparticles with sizes ranging between 1.5 and 7.5 nm	MD	ILS, archetypal analysis	ILS (clustering)	The pure and representative types of disordered platinum nanoparticles from machine learning	243	1	0	1	0
J. Phys. Chem. Lett. 2021, 12, 1573–1580	Pt Binary Alloys	Pt–Ni alloy nanoclusters	Not Mentioned	Total masses, the average number of nearest neighbors, the segregation-extent bond order parameter (BOP), and the shell-resolved undercoordination ratio	DFT Calculated Excess Energy of the Nanoclusters	Supervised Learning | Regression	Segregation-Extent BOP and Shell-Resolved Undercoordination Ratio	500-sample training data set generated by DFT calculation	DFT	GP, GBDT	GP	Physically Compatible Machine Learning Study on the Pt–Ni Nanoclusters	244	1	0	1	0
Chin. J. Chem, 2021, 39, 3029-3036	Pt Binary Alloys	Au13Pt42 nanocluster	Not Mentioned	Features extracted by DeePMD-kit	Neural network potential to predict forces and energies in the crystal	Supervised Learning | Regression	Not Mentioned	42348 structures generated by AIMD and DFT-driven GA-based configurational search	DFT&MD	MLP	MLP	Gold Segregation Improves Electrocatalytic Activity of Icosahedron Au@Pt Nanocluster: Insights from Machine Learning	245	0	1	0	1
J. Phys. Chem. Lett. 2020, 11, 1773–1780	Pt Binary Alloys	core–shell Pt nanoparticles with various core metals such as Ag, Au, Pd, Cu, Ni, and Pt shells, ranging in size from 1.6–6 nm	Not Mentioned	Generalized coordination numbers, nanoparticle sizes, and core materials like Ni, Cu, Pd, Au, and Ag, combined with Pt shell thicknesses	DFT Calculated combination of strain on the nanocatalysts, specifically tensile and compressive strain on atom	Supervised Learning | Regression	Strained generalized coordination numbers	203 nanoparticles	DFT&EMT	RBF-based KR regression	KR	Oxygen Reduction Activities of Strained Platinum Core–Shell Electrocatalysts Predicted by Machine Learning	246	1	0	1	0
InfoMat., 2023, 5, e12406	Pt Binary Alloys	Pt-based binary alloys	Acidic	11 features including a blend of different properties such as coordination number of Pt, number of heteroatoms around Pt, and electronegativity difference between Pt and heteroatoms	DFT Calculated ηORR	Supervised Learning | Regression | Active Learning	The difference between the electronegativity of Pt and heteroatom, the valence electrons number of the heteroatom, and the ratio of heteroatoms around Pt	Initially more than 62 Pt-based alloys, later 77 candidate examined through AL	DFT	SISSO, DT, RF	RF	Data-driven structural descriptor for predicting platinum-based alloys as oxygen reduction electrocatalysts	247	1	0	1	0
Chem Catal., 2021, 1, 855–869	Pt Ternary Alloys	PtFeCu ternary alloy nanoparticles, 2.0 nm size and varying compositions	Acidic	Atomistic interaction potentials parameterized into a neural network and atomic local environments	Neural network potential to predict forces and energies in the crystal	Supervised Learning | Regression	Not Mentioned	44,884 atomic local environments prepared with PtFeCu compositional and configurational space	DFT+Experimental validation	MLP	MLP	First-principle-data-integrated machine-learning approach for high-throughput searching of ternary electrocatalyst toward oxygen reduction reaction	248	0	1	0	1
Phys. Chem. Chem. Phys., 2018,20, 24539-24544	Pt Ternary Alloys	Ternary nanocatalysts comprising Pt, Ni, and Cu	Acidic	Features extracted by amp, Gaussian descriptors on the radial and angular symmetry functions	Neural network potential to predict forces and energies in the crystal	Supervised Learning | Regression	Not Mentioned	13,877 first-principles DFT calculations for PtNi, PtCu, CuNi, and PtCuNi nanoparticles, 2724 for PtNi, 2029 for PtCu, 1554 for CuNi, and 7570 for PtCuNi	DFT&MD	MLP	MLP	First-principles database driven computational neural network approach to the discovery of active ternary nanocatalysts for oxygen reduction reaction	249	0	1	0	1
J. Phys. Chem. C 2021, 125, 16963–16974	Pt Ternary Alloys	ternary Pt15MmNn (m + n = 5) alloy	Not Mentioned	Crystal graphs converted from crystal structures	DFT-calculated O binding and Crystal Formation energy (Enthalpy)	Supervised Learning | Classification and Regression | Active Learning	Not Mentioned	5000 adsorbate structures selected	DFT	CGCNN	CGCNN	Machine Learning-Based Screening of Highly Stable and Active Ternary Pt Alloys for Oxygen Reduction Reaction	250	0	1	0	1
Appl. Catal. B: Environ., 2023, 339, 123128	Pt Ternary Alloys	alloy core@shell configurations (X3Y@Z)	Alkaline	Descriptors of the crystal structures of the top two layers of the slab and adsorbates. Atom vectors and bond vectors are used to represent these features. The atom vectors are one-hot encoded and contain elemental properties available from the periodic table. The bond vectors are simplified to indicate connectivity (yes or no), making them distance-insensitive, unlike the original CGCNN model wh…	DFT-calculated O, OH, OOH, CO binding energies	Supervised Learning | Regression	Group number, period number, melting point, and volume	9267 adsorption energies	DFT+Experimental validation	GNN, CGCNN, and SGCNN	SGCNN	Machine learning filters out efficient electrocatalysts in the massive ternary alloy space for fuel cells	251	0	1	0	1
Joule 2019, 3, 834–845	HEA	HEA Ir-Pd-Pt-Rh-Ru system	Not Mentioned	Structural descriptors reflecting the local atomic environment of the active site, nearest neighbor composition and available binding sites (numbers)	DFT-calculated O, OH binding energy	Supervised learning | regression	Not Mentioned	871 different 2×2 unit cells for *OH and 998 for *O	DFT	Ordinary least squares algorithm (Linear regression)	Linear regression	High-Entropy Alloys as a Discovery Platform for Electrocatalysis	252	1	0	1	0
Angew. Chem. Int. Ed., 2021, 60, 6932–6937	HEA	HEA Ag-Ir-Pd-Pt-Ru (thin-film)	Acidic	Local atomic environment descriptors, specifically the nearest neighbour compositions around on-top and hollow binding sites	DFT-calculated O, OH binding energy	Supervised Learning | Regression | Active Learning (given the iterative refinement mentioned)	Not Mentioned	3317 DFT calculated *OH and *O binding energies on randomly populated 2x2 slabs	DFT	Sequential least squares programming (Linear regression)	Linear regression	Complex-Solid-Solution Electrocatalyst Discovery by Computational Prediction and High-Throughput Experimentation	253	1	0	1	0
Angew. Chem. Int. Ed., 2021, 60, 24144–24152	HEA	HEA Ir-Pd-Pt-Rh-Ru & Ag-Ir-Pd-Pt-Ru systems, along with binary alloy systems like Ag–Pd, Ir–Pt, and Pd–Ru	Acidic	One-hot encoding the identity of the adsorption site ensemble, 15 fitted parameters for each on-top OH adsorption site and 55 fitted parameters for fcc hollow adsorbing O are used	Current density corresponding to different compositions computed based on models proposed in Angew. Chem. Int. Ed., 2021, 60, 6932–6937	Supervised Learning | Regression | Bayesian optimization	Not Mentioned	Ag-Ir-Pd-Pt-Ru quinary alloy: 1304 OH and 1768 O adsorption energies were simulated; Ir-Pd-Pt-Rh-Ru system: 856 OH and 997 O adsorption energies	DFT	GP, Linear Regression, GBDT (for Binary)	GP	Bayesian Optimization of High-Entropy Alloy Compositions for Electrocatalytic Oxygen Reduction	254	1	0	1	0
Adv. Energy Mater. 2022, 12, 2103312	HEA	HEA Ru–Rh–Pd–Ir–Pt	Acidic	Linear sweep voltammograms and compositional data	Compositional variations	Supervised Learning | Regression	Not Mentioned	2052 linear sweep voltammograms for training data	Experimental, but it is also compared to a DFT dataset	Linear Regression	Linear regression	Unravelling Composition–Activity–Stability Trends in High Entropy Alloy Electrocatalysts by Using a Data-Guided Combinatorial Synthesis Strategy and Computational Modeling	255	1	0	1	0
Matter 2020, 3, 1318–1333	HEA	HEA Ir-Pd-Pt-Rh-Ru	Acidic	Ligand effect (element identity and spatial arrangement), coordination effect (different crystal facets and defects), nearest-neighbor descriptors, coordination environments, coordination factors, period number, group number, and metallic atomic radii	DFT-calculated O, OH binding energy	Supervised Learning | Regression	Coordination number and element identity	Over 1,000 high-fidelity DFT-calculated data points	DFT	MLP	MLP	Neural Network-Assisted Development of High-Entropy Alloy Catalysts: Decoupling Ligand and Coordination Effects	256	0	1	0	1
J. Phys. Chem. Lett. 2022, 13, 1042–1048	HEA	Pt-free HEA Pd-Au-Ag-Ti and Pd-Cu-Zn-Ti	Not Mentioned	Features based on the geometrical and chemical environment of the adsorption site	DFT-calculated OH binding energy	Supervised Learning | Regression	Geometrical and chemical environment of the adsorption site	2465 adsorption energy configurations for PdAuAgTi and 2045 for PdCuZnTi HEAs	DFT	CNN	CNN	Optimizing the Catalytic Activity of Pd-Based Multinary Alloys toward Oxygen Reduction Reaction	257	0	1	0	1
J. Phys. Chem. C 2023, 127, 15809–15818	HEA	CoFeNi-X, where X represents Mn, Cr, or Mo	Not Mentioned	40 features in total, including real-value distances between the oxygen atom of the adsorbate and the five nearest neighbors of each element in the HEA and occupation numbers of different elements in the HEA at binned distances from the oxygen atom of the adsorbate	DFT-calculated O, OH binding energy	Supervised Learning | Regression	Distances between the oxygen atom of the adsorbate and the five nearest neighbors of each element in the HEA	235 for O* on CoFeNiMn, 244 for O* on CoFeNiCr, and 270 for O* on CoFeNiMo. For HO*, the sizes are 358, 391, and 418, respectively.	DFT	RF, SVM	SVR	Density Functional Theory-Machine Learning Characterization of the Adsorption Energy of Oxygen Intermediates on High-Entropy Alloys Made of Earth-Abundant Metals	258	1	0	1	0
Carbon, 2023, 201, 703-711	Doped Carbon Structures-Theoretical Studies	Graphene nanoribbons (GNRs) with various edge-dopants including sulfur, phosphorous, sulfur dioxide, and phosphorous dioxide	Not Mentioned	π orbital descriptors, namely the density of states at the Fermi level and relative π orbital occupancy (R-Oπ)	DFT-calculated Gibbs free energy of OH binding	Supervised Learning | Regression	Density of states at Fermi level and relative occupancy	161 DFT calculated data points	DFT	Multiple Linear Regression, DT, RF, KNN, XGBoost, and SVM	SVR	Identification of ORR activity of random graphene-based systems using the general descriptor and predictive model equation	262	1	0	1	0
Appl. Surf. Sci., 2023, 613, 156084	Doped Carbon Structures-Theoretical Studies	γ-graphdiyne nanoribbons with various N-doping configurations	Acidic	8 parameters including distances between adsorption site and the two directly bonded atoms, the atomic numbers, and atomic charge of the two atoms	DFT-calculated ηORR and ηHER	Supervised Learning | Regression	Distance between the adsorption site and the closest atom and the atomic charge of the adsorption site	500 DFT-obtained results	DFT	LightGBM, Linear Regressor, Poly-linear regression, RF and GBDT	LightGBM	Revisiting the origin of ORR and HER activities of N-doped γ-graphdiyne from the perspective of edge effects	263	1	0	1	0
J. Mater. Chem. A, 2023,11, 17045-17055	Doped Carbon Structures-Theoretical Studies	Defect-engineered graphene with N-dopants and intrinsic defects	Alkaline	π electronic descriptors, Types of defects and nitrogen content	DFT-calculated Gibbs free energy of OH binding	Supervised Learning | Regression	Defect type and nitrogen species content	22 active sites in model I Additional active sites in models II and III	DFT+Experimental validation	SVM, and simple linear fit (Linear Regression)	SVM	Elucidating the oxygen reduction reaction kinetics on defect engineered nanocarbon electrocatalyst: interplay between the N-dopant and defect sites	264	1	0	1	0
J. Phys. Chem. C 2023, 127, 2303–2313	Doped Carbon Structures-Theoretical Studies	Graphite-conjugated catalysts	Not Mentioned	Structural and electronic aspects like spin density, partial charge difference, and ionization energy among others	DFT-calculated O2 binding energy	Supervised Learning | Regression| Classfication	Spin Density, Partial Charge Difference, First Ionization Energy	258 molecules via a simple structure search for pyridinic moieties (cationic nitrogen atoms encased in an aromatic system) in the ChemSpider database	DFT	RF, MLP, SVM, DT, and logistic regression	RF	Machine Learning Identification of Active Sites in Graphite Conjugated Catalysts	265	1	1	0	0
J. Energy Chem., 2023, 81, 349-357	Doped Carbon Structures-Theoretical Studies	TM, nitrogen-doped SAC on graphene substrate	Not Mentioned	37 input features based on geometric and electronic properties	DFT-calculated ηORR and the embedding energy	Supervised Learning | Regression	Number of d-electrons of the central metal atom	448 structures	DFT	KNN, SVM, MLP, RF, and GBDT	RF	High throughput screening of single atomic catalysts with optimized local structures for the electrochemical oxygen reduction by machine learning	266	1	1	0	0
Phys. Chem. Chem. Phys., 2023, 25, 18983-18989	Doped Carbon Structures-Theoretical Studies	TM,N-doped 2D graphene-based SAC, specifically MNxCy and ZZ/ZA-MNxCy systems	Not Mentioned	Valence electron number, d electron number, electronegativity, and the periodic number of central metal etc.	DFT-calculated ηORR	Supervised Learning | Regression	Valence electron correction and degree of construction differences	207 MNxCy electrocatalysts	DFT	RF	RF	The rational design of high-performance graphene-based single-atom electrocatalysts for the ORR using machine learning	267	1	0	1	0
J. Mater. Chem. A, 2020,8, 19290-19299	Doped Carbon Structures-Theoretical Studies	TM, nitrogen-doped SAC on graphene substrate	Acidic	5 parameters of TMs: including the atomic dimension and structure, group number etc.	DFT-calculated ηORR	Supervised Learning | Regression	The intrinsic catalytic activity descriptor combined by	14 input–target pairs derived from DFT calculations	DFT	MLP	MLP	Rational design of transition metal single-atom electrocatalysts: a simulation-based, machine learning-accelerated study	268	0	1	0	1
J. Phys. Chem. Lett. 2023, 14, 4760–4765	Doped Carbon Structures-Theoretical Studies	Ni(II), Co(II), Cu(II), Fe(II), Fe(III), and Mn(II) supported on 15 different N–C substrates	Not Mentioned	Geometric distances, atomic charges, and spin states, as well as a new data-driven descriptor based on the geometrical configuration of adsorbed O2 and parameters that depend on intrinsic properties of each substrate	DFT-calculated Gibbs free energy of O2 binding	Supervised Learning | Regression	Data-driven descriptor derived from the geometrical configuration	90 DFT calculated datapoints on 15 different N–C substrates	DFT	SISSO	SISSO	Decoupling Analysis of O2 Adsorption on Metal–N–C Single-Atom Catalysts via Data-Driven Descriptors	269	1	0	1	0
J. Mater. Chem. A, 2020,8, 24563-24571	Doped Carbon Structures-Theoretical Studies	Dual-TM metal SACs on N-graphene	Not Mentioned	7 descriptors including the distance of two metal atoms, the average distance between two metal atoms and the coordinated N atoms, the radii of two metal atoms, the outer electron number of two metal atoms, the Pauling electronegativity, the first ionization energy, and the electron affinity of the two metals	DFT-calculated ηORR	Supervised Learning | Regression	The distance of two metal atoms, and The distance of two metal atoms	66 DFT calculated datapoints, 11 homonuclear and 55 heteronuclear structures	DFT	RF	RF	Understanding activity origin for the oxygen reduction reaction on bi-atom catalysts by DFT studies and machine-learning	270	1	0	1	0
J. Phys. Chem. Lett. 2019, 10, 7760–7766	Doped Carbon Structures-Theoretical Studies	Dual-TM metal SACs on N-graphene	Not Mentioned	33 features properties such as electron affinity, electronegativity, radii of the embedded metal atoms, properties of continuum s- and p-orbitals, and localized d-orbitals, as well as structure-related parameters like bond length and van der Waals radius	DFT-calculated Gibbs free energy of OH binding	Supervised Learning | Regression	Electron affinity, van der Waals radii sum, difference in Pauling electronegativity, product of ionization energy of the first metal atom and bond length, sum of Pauling electronegativity, and average distance between metal atoms and surrounding nitrogen atoms	101 DFT calculated structures	DFT	GBDT, Ridge, KNN, SVM, RF, MLP	GBDT	Activity Origin and Design Principles for Oxygen Reduction on Dual-Metal-Site Catalysts: A Combined Density Functional Theory and Machine Learning Study	271	1	1	0	0
Molecules, 2021, 26, 3858	Doped Carbon Structures-Experimental Studies	Nitrogen-doped graphene	Alkaline	Information regarding the materials’ properties: including the nitrogen content, pyridinic and pyrrolic N content, Csp2/Csp3 ratio, C-O or C=O amounts, FWHM of the XRD peak, ID′/IG, I2D/IG ratios, G peak positions	Experimental Measured ORR transfer electron number	Supervised Learning | Regression	Not Mentioned	Experimental records, size not mentioned	Experimental	19 different types of ML algrothms	Stepwise Linear Regression	Eco-Friendly Nitrogen-Doped Graphene Preparation and Design for the Oxygen Reduction Reaction	272	1	0	1	0
ACS Appl. Nano Mater. 2022, 5, 17095–17104	Doped Carbon Structures-Experimental Studies	Hollow carbon spheres prepared through emulsion interfacial polymerization	Alkaline	10 experimental parameters: reactants such as amounts of dopamine hydrochloride, TOA (trioctylamin), ammonia, water, and alcohol, as well as synthesis parameters like ultrasonic emulsification time etc.	The morphologies of the polymerization products, particularly whether they are hollow or solid and whether the hollow spheres are homogeneous in size	Supervised Learning | Classification	For hollow/solid morphology: Reaction time, amounts of TOA and water, first ultrasonic emulsification time. For homogeneity: Second ultrasonic emulsification time, reaction time, amounts of dopamine, TOA, and ammonia.	Hollow/Solid Spheres Dataset: 46 data entries. Homogeneity Dataset: 37 data entries	Experimental	SVM, RF, GBDT, AdaBoost	GBDT	Machine Learning Captures Synthetic Intuitions for Hollow Nanostructures	273	1	0	1	0
Nano Energy, 2022, 94, 106868	Doped Carbon Structures-Experimental Studies	2D defective nitrogen-doped graphene nanomesh loaded with a metal macrocycle of iron phthalocyanines	Alkaline	9 descriptors, carbon content, oxygen content, nitrogen content etc.	Experimental Measured ORR onset potential	Supervised Learning | Regression	Nitrogen content and BET surface area	123 different carbon materials collected from 50 literatures	Experimental	SVM, RF, KNN	RF	Materials informatics-guided superior electrocatalyst: A case of pyrolysis-free single-atom coordinated with N-graphene nanomesh	274	1	0	1	0
ACS Appl. Energy Mater. 2020, 3, 9083–9088	Doped Carbon Structures-Experimental Studies	ZIF-derived Fe-N-C	Acidic	Pyrolysis temperature, atomic percent of Fe in the sum of Fe + Zn (Fe%), and Fe precursor (FePre), represented numerically as a number of atoms in the precursor molecule	Experimental Measured ORR mass activity, represented as current density in A/gcatalyst	Supervised Learning | Regression	Pyrolysis Temperature	Experimental records, consisting of 36 samples	Experimental	GBR, SVM, MLP, RF, polynomial regression	GBDT	Coupling High-Throughput Experiments and Regression Algorithms to Optimize PGM-Free ORR Electrocatalyst Synthesis	275	1	1	0	0
J. Power Sources, 2023, 559, 232583	Doped Carbon Structures-Experimental Studies	ZIF-derived Fe-N-C	Acidic	Six independently controlled synthesis variable	Experimental Measured ORR mass activity at 0.8 V vs RHE	Supervised Learning | Regression | Adaptive learning | Uncertainty Measurement	Pyrolysis Time	Initial database of 18 samples, and later, 14 new catalysts were synthesized	Experimental	GP, RF, MLP	RF	Adaptive learning-driven high-throughput synthesis of oxygen reduction reaction Fe–N–C electrocatalysts	276	1	1	0	0
ACS Catal. 2021, 11, 9798–9808	Doped Carbon Structures-Experimental Studies	ZIF-derived Fe-N-C	Acidic	14 chemical properties and testing parameters: Zn Content, Co Content, Fe Content, O Content, S Content, content of pyridinic species, content of graphitic species, content of oxidized species, Raman ID/IG Ratio, BET Surface Area, Micropore Ratio, Mesopore Ratio, Catalyst Loading, and Rotating Speed.	Experimental Measured E1/2 of ORR	Supervised Learning | Regression | Classification	pyridinic nitrogen and pyrolysis temperature and pyrolysis time	225 entries from 103 studies	Experimental	9 different ML algorithms including RF, MLP, GBDT, XGBoost, CatBoost etc.	GBDT	Machine Learning-Guided Discovery of Underlying Decisive Factors and New Mechanisms for the Design of Nonprecious Metal Electrocatalysts	277	1	1	0	0
ACS Appl. Mater. Interfaces 2022, 14, 1249–1259	Other Materials	TM@VAl–2NP–AlP, where TM specifically refers to Fe, Co, and Ni	Not Mentioned	9 input features including Bond length of TM atoms and their neighboring atoms, Bond length of TM atoms and the adsorbed OH species, The d-band center, and The charge transfer of TM atoms	DFT-calculated Gibbs OH adsorption energy	Supervised Learning | Regression	The number, radius, and charge transfer of TM atom	16 groups of data	DFT	GBDT	GBDT	Transition Metal and N Doping on AlP Monolayers for Bifunctional Oxygen Electrocatalysts: Density Functional Theory Study Assisted by Machine Learning Description	278	1	0	1	0
Nat. Energy, 2022, 7, 866–875	Other Materials	ABO3-type perovskite oxides	Alkaline	Nine ionic descriptors A- and B-site: Ionic Lewis acid strength values, ionic electronegativities, ionic radii and ionization energies etc.	Area-specific resistance	Supervised Learning | Regression	Ionic Lewis acid strength of B site TM	162 records from the literature and previous work	Experimental	8 different ML algorithms including RF, MLP etc.	MLP	A combined ionic Lewis acid descriptor and machine-learning approach to prediction of efficient oxygen reduction electrodes for ceramic fuel cells	279	1	1	0	0
J. Mater. Chem. A, 2021, 9, 6841-6850	MEA Perspective	Pt-based precious metal electrocatalysts in MEA for PEMFCs	Acidic	66 initial features including electrocatalysts properties, MEA engineering parameters and testing conditions, 27 retained after feature selection	Maximum power density and current densities under different voltages	Supervised Learning | Regression	Cathode noble metal Pt loading, catalyst mass activity, thickness of the Nafion membrane, Pt mass ratio, and backpressure applied during evaluation	918 entries from 295 publications	Experimental	35 different ML algorithms including XGBoost, MLP etc.	MLP	Applying machine learning to boost the development of high-performance membrane electrode assembly for proton exchange membrane fuel cells	280	1	1	0	0
Angew.Chem.Int.Ed., 2020, 59, 19175–19183	MEA Perspective	Nonprecious metal electrocatalysts in MEA for PEMFCs	Acidic	26 input features including electrocatalysts properties, MEA engineering parameters and testing conditions in single cells	Maximum power density and current densities under different voltages	Supervised Learning | Regression	Backpressure, cathodic loading amount and BET surface area	140 entries from 64 publications	Experimental	16 different ML algorithms including XGBoost, MLP etc.	MLP	Designing AI-Aided Analysis and Prediction Models for Nonprecious Metal Electrocatalyst-Based Proton-Exchange Membrane Fuel Cells	281	1	1	0	0
Energy Convers. Manag., 2021, 243, 114367	MEA Perspective	Nonprecious metal electrocatalysts in MEA for PEMFCs	Acidic	Directly use the same dataset provided by Angew.Chem.Int.Ed., 2020, 59, 19175–19183	Directly use the same dataset provided by Angew.Chem.Int.Ed., 2020, 59, 19175–19183	Supervised Learning | Regression	Not Mentioned	Directly use the same dataset provided by Angew.Chem.Int.Ed., 2020, 59, 19175–19183	Experimental	CNN	CNN	Performance prediction of proton-exchange membrane fuel cell based on convolutional neural network and random forest feature selection	282	0	1	0	1
